1 **Title:** Genetic architectures of larval pigmentation and color pattern in the redheaded  
2 pine sawfly (*Neodiprion lecontei*)

3  
4 **Authors:** Catherine R. Linnen<sup>\*</sup>, Claire T. O'Quin<sup>\*</sup>, Taylor Shackelford<sup>\*</sup>, Connor R.  
5 Sears<sup>\*†</sup>, Carita Lindstedt<sup>‡</sup>

6  
7 **Running title:** Genetic basis of pigmentation and pattern

8  
9 **Keywords:** larval color, carotenoids, melanin, genetic complexity, evolutionary genetics

10  
11 **Corresponding author:** Catherine R. Linnen, 204E Thomas Hunt Morgan Building,  
12 Lexington, KY 40506, 859-323-3160, Catherine.linnen@uky.edu

---

<sup>\*</sup> Department of Biology, University of Kentucky, Lexington, KY, 40506

<sup>†</sup> Current affiliation: Department of Biological Sciences, University of Cincinnati,  
Cincinnati, OH, 45221

<sup>‡</sup> Centre of Excellence in Biological Interactions, Department of Biological and  
Environmental Sciences, University of Jyväskylä, Jyväskylä, Finland, FI-40014

13  
14  
15  
16  
17  
18  
19  
20  
21  
22  
23  
24  
25  
26  
27  
28  
29  
30  
31  
32  
33  
34  
35  
36  
37  
38  
39  
40  
41  
42  
43  
44  
45  
46  
47  
48  
49  
50  
51  
52  
53  
54  
55  
56  
57

## ABSTRACT

Evolutionary biologists have long debated the contribution of large-effect mutations to phenotypic evolution. Although theoretical work suggests that developmental, demographic, and ecological contexts can have profound and predictable impacts on trait genetic architectures, there are few empirical tests of these predictions. Here, we test the hypothesis that, due to differences in pleiotropy in the underlying genetic pathways, the genetic architecture of overall body color (pigmentation) is predictably simpler (*i.e.*, large-effect mutations explain proportionally more of the phenotypic variance) than that of color patterning. To test this prediction, we crossed divergent populations of the redheaded pine sawfly (*Neodiprion lecontei*) that differ in larval body color and melanic spotting pattern and measured these traits in their recombinant haploid male progeny. Using a combination of interval mapping and polygenic association mapping, we identified large-effect QTL for both traits. Consistent with the pigmentation/patterning hypothesis, we found that compared to spotting pattern, body color had a larger percentage of genetic variance attributable to large-effect loci. Additionally, by combining mapping results with a linkage group-anchored genome assembly for *N. lecontei*, we identified several promising candidate genes for both carotenoid-based yellow pigmentation and melanin-based spotting pattern. Because few studies have investigated the genetic basis of naturally occurring variation in larval color and carotenoid-based pigmentation, our study helps fill a void in the invertebrate pigmentation literature. Finally, we argue that when leveraged to test explicit *a priori* hypotheses regarding trait genetic architectures, polygenic association mapping has the potential to shed new light on the 150-year-old micromutationist-macromutationist debate.

## INTRODUCTION

One of the longest running debates in evolutionary biology—tracing its roots back to disagreements between Darwin (1859) and Huxley (1860)—centers on the contribution of large-effect mutations to evolutionary change (Mayr 1982; Orr and Coyne 1992). At one extreme, “micromutationists” (*e.g.*, Darwin 1859; Pearson 1897; Fisher 1930) have argued that adaptation results from the accumulation of many alleles of individually small effect. At the other extreme, “macromutationists” (*e.g.*, Huxley 1860; Bateson 1913; Morgan 1932; Goldschmidt 1940) have emphasized the role of a small number of large-effect mutations as the primary drivers of evolutionary change. As often happens when there is a debate between two conceptual extremes, empirical data on trait genetic architectures point to a continuum rather than a strict dichotomy (Mackay *et al.* 2009; Rockman 2012; Remington 2015; Dittmar *et al.* 2016). These data indicate that it is time to move beyond extreme caricatures of the evolutionary process. Instead, with the development of novel theory (Orr 2005; Dittmar *et al.* 2016) and powerful new tools for linking genotype to phenotype in non-model organisms (Davey *et al.* 2011; Gaj *et al.* 2013; Goodwin *et al.* 2016; Huang *et al.* 2016), we can start to make and test explicit predictions about where on the micromutationist-macromutationist continuum different traits, organisms, and evolutionary scenarios will fall.

58 Evolutionary theory predicts that the developmental pathways that give rise to a  
59 particular trait, the type of selection acting on that trait, and the demography of the  
60 evolving population can all have profound impacts on the expected contribution of large-  
61 effect mutations to adaptation (Remington 2015; Dittmar *et al.* 2016). Collectively,  
62 theoretical work to date suggests that large-effect mutations are more likely to contribute  
63 to adaptation when: pleiotropy is minimal (Fisher 1930; but see Matuszewski *et al.*  
64 2014), the effective population size is small (Kimura 1983), the population is adapting to  
65 a rapidly moving fitness optimum (Matuszewski *et al.* 2014), the fitness landscape has  
66 multiple optima (Orr 1998; Matuszewski *et al.* 2015), the population is far from the  
67 phenotypic optimum (Orr 1998), migration occurs between locally adapted populations  
68 (Griswold 2006; Yeaman and Whitlock 2011), and/or adaptation proceeds via new  
69 mutations (Hermisson and Pennings 2005; Matuszewski *et al.* 2015). While additional  
70 theoretical work is needed to more fully explore possible evolutionary scenarios, there is  
71 also a dearth of empirical tests of existing theoretical predictions (but see Baxter *et al.*  
72 2009; Rogers *et al.* 2012; Martin *et al.* 2017). Given the many factors that influence trait  
73 genetic architectures, rigorous tests of these predictions require the integrated study of the  
74 genetic basis of trait variation, the evolutionary history of populations, and the selective  
75 pressures shaping trait variation.

76 As one of the best studied morphological characteristics in nature—both from an  
77 ecological and a genetic perspective—color features prominently in the adaptation  
78 genetics literature (True 2003; Protas and Patel 2008; Wittkopp and Beldade 2009;  
79 Manceau *et al.* 2010; Nadeau and Jiggins 2010; Kronforst *et al.* 2012). For many  
80 organisms, overall color is determined by two different types of color traits: (1) the type  
81 (and amount) of pigment synthesized (“pigmentation”) and (2) the distribution of  
82 pigmentation across the body (“color pattern”) (Manceau *et al.* 2010). The abundance of  
83 discrete pigmentation phenotypes in nature, coupled with the identification of many  
84 large-effect pigmentation mutations via candidate gene analysis, have led some to argue  
85 that the genetic architecture of pigmentation traits—but not color pattern traits—is  
86 atypically simple (Rockman 2012). This simplicity is thought to arise as a consequence of  
87 relatively small genetic pathways with at least some minimally pleiotropic genes that  
88 would be permissive of large-effect pigmentation mutations (Rockman 2012).

89 Testing the hypothesis that the genetic basis of pigmentation is predictably  
90 “simpler” (*i.e.*, more likely to fall on the macro- end of the micromutationist-  
91 macromutationist continuum) than that of color pattern will require describing the genetic  
92 architecture of both types of traits in many different organisms. Although some relevant  
93 data exist (*e.g.*, Martin and Orgogozo 2013), experimental and publication biases make it  
94 difficult to draw strong conclusions. For example, good *a priori* candidates and a focus  
95 on discrete pigmentation phenotypes that are easy to score may have biased identified  
96 pigmentation loci towards those of large effect (Kopp 2009; Manceau *et al.* 2010;  
97 Rockman 2012). Thus, to better understand consistent differences that may exist between  
98 pigmentation and color pattern traits, more unbiased, genome-wide analyses of  
99 continuously varying color traits are needed (*e.g.*, Signor *et al.* 2016).

100 With these considerations in mind, pine sawflies in the genus *Neodiprion* provide  
101 an excellent empirical system for systematically investigating the genetic architecture of  
102 different color traits. First, there is extensive variation in larval pigmentation and larval  
103 color pattern both within and between species (Figures 1-2). Second, there is information

104 available on evolutionary relationships between species and, for some species,  
105 demographic histories of populations within species (Linnen and Farrell 2007, 2008a; b;  
106 Bagley *et al.* 2017). Third, it is possible to rear and cross many different *Neodiprion*  
107 species in the lab, making genetic mapping approaches tractable (Knerer and Atwood  
108 1972, 1973; Kraemer and Coppel 1983; Bendall *et al.* 2017). Fourth, a growing list of  
109 genomic resources for *Neodiprion*—including an annotated genome and methylome for  
110 *N. lecontei* (Vertacnik *et al.* 2016; Glastad *et al.* 2017)—will facilitate fine-mapping and  
111 identification of causal genes and mutations. And finally, we have some understanding of  
112 the ecological function of color variation in pine sawflies and, more generally, in insects,  
113 which we review briefly before returning to the topic of trait genetic architecture.

114 Under natural conditions, pine sawfly larvae are attacked by a diverse assemblage  
115 of arthropod and vertebrate predators, by a large community of parasitoid wasps and  
116 flies, and by fungal, bacterial, and viral pathogens (Coppel and Benjamin 1965; Wilson *et*  
117 *al.* 1992; Codella and Raffa 1993). To defend against predators and parasites, pine  
118 sawflies have evolved responsive chemical defenses: when threatened, larvae regurgitate  
119 a resinous defensive fluid, which they sequester from the host during feeding in a  
120 specialized pair of esophageal diverticula (Codella and Raffa 1993). This defensive  
121 regurgitation, which is often accompanied by a characteristic “U-bend” posture (Figure 1)  
122 and rhythmic jerking, is an effective repellent against many different predators and  
123 parasitoids (Eisner *et al.* 1974; Codella and Raffa 1995; Lindstedt *et al.* 2006, 2011).  
124 Although most *Neodiprion* species appear to be chemically defended and exhibit similar  
125 defensive displays, they vary from a green striped morph that is cryptic against a  
126 background of pine foliage to highly conspicuous aposematic morphs with dark spots or  
127 stripes overlaid on a bright yellow or white background (Figure 1). Thus, larval color is  
128 likely to confer protection against predators either via preventing detection (crypsis) or  
129 advertising unpalatability (aposematism) (Ruxton *et al.* 2004).

130 Beyond contributing to cryptic or aposematic coloration, *Neodiprion* larval color  
131 traits are likely shaped by several additional abiotic and biotic selection pressures. For  
132 example, coloration plays diverse ecological roles in insects, including thermoregulation,  
133 protection against UV damage, desiccation tolerance, and resistance to abrasion (True  
134 2003; Lindstedt *et al.* 2009; Wittkopp and Beldade 2009). In addition to acting on  
135 specific color traits, selection may also act on color alleles via their pleiotropic effects on  
136 other traits, such as behavior, immune function, diapause/photoperiodism, fertility, and  
137 developmental timing (True 2003; Wittkopp and Beldade 2009; Heath *et al.* 2013;  
138 Lindstedt *et al.* 2016). In short, there are many direct and indirect selection pressures  
139 acting on larval coloration, and temporal and spatial variation in these pressures likely  
140 contribute to the abundant intraspecific and interspecific variation in the genus  
141 *Neodiprion*.

142 As a first step to testing the hypothesis that the genetic basis of pigmentation is  
143 predictably simpler than the genetic basis of color pattern (hereafter, the  
144 “pigmentation/pattern hypothesis”), we conducted a quantitative trait locus (QTL)  
145 mapping study of larval pigmentation and larval spotting pattern in the redheaded pine  
146 sawfly, *Neodiprion lecontei* (Figure 2A). This species is widespread across eastern North  
147 America, where it feeds on multiple pine species. A recent population genomic study  
148 identified three main genetic clusters within *N. lecontei* that diverged during the  
149 Pleistocene and exhibit consistent differences in larval coloration: (1) a southeastern

150 lineage (“South”) with heavily spotted, yellow larvae and dark head capsules in early  
151 instars, (2) a central/mid-Atlantic lineage (“Central”) with heavily spotted larvae that are  
152 predominantly white in some populations and predominantly yellow in others, and (3) a  
153 northern lineage (“North”) with reduced spotting and yellow bodies (Bagley *et al.* 2017).  
154 We focus here on the genetic basis of color differences between a white, heavily spotted  
155 “Central” population and a yellow, lightly spotted “North” population (Figure 2).

156 The pigmentation/pattern hypothesis predicts that, compared to the distribution of  
157 effect sizes underlying larval color pattern, the distribution of effect sizes underlying  
158 larval pigmentation will be shifted towards mutations of larger effect. Although detection  
159 limits on small-effect QTL make it impossible to estimate the full effect-size distribution  
160 (Otto and Jones 2000; Mackay *et al.* 2009; Rockman 2012), we can nevertheless  
161 determine whether there are obvious differences among traits in the number and effect  
162 size of QTL that pass the detection threshold in a single mapping population.

163 Here, we use two complimentary approaches to test the prediction that the  
164 genetic architecture of larval pigmentation will be shifted towards large-effect mutations.  
165 First, we perform traditional interval mapping analyses in R/qtl (Broman and Sen 2009).  
166 Using this method, we determine both the number and effect sizes of QTL detected for  
167 each trait. The pigmentation/pattern hypothesis predicts that, compared to larval spotting,  
168 larval body color will have the largest-effect QTL and/or more QTL of moderate to large  
169 effect. Second, to provide a more direct description of genetic architecture, we employ a  
170 Bayesian Sparse Linear mixed model (BSLMM) developed for genome-wide association  
171 (GWA) mapping (Zhou *et al.* 2013). This approach yields quantitative estimates of trait  
172 genetic architecture, including a parameter that describes the proportion of genetic  
173 variance that is attributable to large-effect (“sparse”) alleles. The pigmentation/pattern  
174 hypothesis predicts that estimates for this parameter will be higher for larval  
175 pigmentation than for larval color pattern. Finally, as a first step to identifying casual  
176 loci, we use our linkage map data to anchor the current *N. lecontei* genome assembly,  
177 then identify potential candidate genes within each QTL interval.

178

179

## MATERIALS AND METHODS

180

### Cross Design

182 To investigate the genetic architecture underlying sawfly color traits, we crossed  
183 *Neodiprion lecontei* females from a white-bodied, dark spotted population (collected  
184 from Valley View, VA; 37°54’47”N, 79°53’46”W) to *N. lecontei* males from a yellow-  
185 bodied, light-spotted population (collected from Bitely, MI; 43°47’46”N, 85°44’24”W).  
186 Both populations had been collected from the field in 2012 and reared on *Pinus*  
187 *banksiana* (jack pine) for at least two (VA population) or three (MI population)  
188 generations in the lab via standard rearing protocols (described in more detail in Harper *et al.*  
189 *et al.* 2016; Bendall *et al.* 2017). Our mapping families were derived from four  
190 grandparental pairs, which produced 10 F<sub>1</sub> females. Like most hymenopterans, *N. lecontei*  
191 adults reproduce via arrhenotokous haplodiploidy, in which unfertilized eggs develop  
192 into haploid males and fertilized eggs develop into diploid females (Heimpel and de Boer  
193 2008; Harper *et al.* 2016). Therefore, to produce an F<sub>2</sub> haploid generation, we allowed  
194 virgin F<sub>1</sub> females to lay eggs and reared their haploid male progeny on *P. banksiana*

195 foliage until they reached a suitable size for phenotyping. In total, we collected  
196 phenotypic and genotypic data from 429 F<sub>2</sub> male progeny for QTL mapping.

197

### 198 **Color phenotyping**

199 *N. lecontei* larvae pass through five (males) or six (females) feeding instars and a  
200 single non-feeding instar, which are distinguishable on the basis of color pattern and size  
201 (head capsule width and body length) (Benjamin 1955; Coppel and Benjamin 1965;  
202 Wilson *et al.* 1992). For phenotyping, we chose only mature feeding larvae, which have  
203 an orange-red head capsule with a black ring around each eye and up to four paired rows  
204 of gray to black spots (Wilson *et al.* 1992). We excluded any individuals that had molted  
205 to the final non-feeding instar, which have a very different head capsule color and  
206 spotting pattern. To generate digital images for phenotyping, we photographed CO<sub>2</sub>-  
207 immobilized larvae (lateral surface) with a Canon EOS Rebel t3i camera equipped with  
208 an Achromat S 1.0X FWD 63mm lens. We then preserved each larva in 100% ethanol for  
209 molecular work. In total, we generated color phenotype data for 30 individuals from the  
210 VA population (mixed sex), 30 individuals from the MI population (mixed sex), 47 F<sub>1</sub>  
211 females, and 429 F<sub>2</sub> males (progeny of 10 virgin F<sub>1</sub> females).

212 To quantify larval body color from our digital photos, we used Adobe Photoshop  
213 CC 2014 or 2015 (Adobe Systems Incorporated, San Jose, CA) to ascertain the amount of  
214 yellow present, following O'Quin *et al.* (2013). First, we converted each digital image to  
215 CMYK color mode. Next, we selected the eye dropper tool (set to a size of 5x5 pixels) as  
216 the color sampler tool, which we used to sample three different body locations: the body  
217 just behind the head and parallel to the eye, the first proleg, and the anal proleg. For each  
218 of the three regions, this procedure yielded an estimate of the proportion of the selected  
219 area that was yellow. We then averaged the three measurements to produce a single final  
220 measurement of yellow pigmentation (hereafter referred to as "yellow").

221 To quantify larval spotting pattern, we used Adobe Photoshop's quick-selection  
222 tool to measure the area of the larval body (minus the head capsule) and the area of each  
223 row of lateral black spots. To control for differences in larval size, we divided the  
224 summed area of all lateral black spots by the area of the larval body. We refer to this  
225 phenotypic measure as "spotting". We also used the larval images to calculate the area of  
226 the head capsule, which we used as a covariate in some analyses to control for larval size  
227 (see below). We used a custom Perl script to process Photoshop measurement output files  
228 in bulk (written by John Terbot II; available upon request).

229 To determine whether mean phenotypic values for yellow and spotting differed  
230 between the two populations and among the three generations of our cross, we performed  
231 Welch's two-tailed *t*-tests. To determine the extent to which yellow and spotting co-  
232 varied in the F<sub>2</sub> males, we calculated Pearson's correlation coefficient (*r*). To determine  
233 which covariates to include in our QTL models, we performed ANOVAs to evaluate the  
234 relationship between the two phenotypes in the F<sub>2</sub> males (429 total) and their F<sub>1</sub> mothers  
235 (10 total) and head capsule sizes (a proxy for larval size/developmental stage). These and  
236 all other statistical analyses were performed in R version 3.3.2 (R Core Team 2013)

237

### 238 **Genotyping**

239 We extracted DNA from ethanol-preserved larvae using a modified CTAB  
240 method (Chen *et al.* 2010) and prepared barcoded and indexed double-digest RAD

241 (ddRAD) libraries using methods described elsewhere (Peterson *et al.* 2012; Bagley *et al.*  
242 2017). We chose *NlaIII* and *EcoRI* as our restriction enzyme pair based on our previous  
243 experience using this enzyme pair for a population genomic analysis of *N. lecontei*  
244 (Bagley *et al.* 2017). We prepared a total of 10 indexed libraries: one consisting of the  
245 eight grandparents and 10 F<sub>1</sub> females (18 adults total), and the remaining nine consisting  
246 of F<sub>2</sub> haploid male larvae (~48 barcoded males per library). After digestion, adapter  
247 ligation, and pooling, we performed automated size selection of a 376-bp fragment (+/-  
248 38 bp) from each library on a Pippin Prep (Sage Science, Beverly MA). Following size  
249 selection, we performed 12 rounds of high-fidelity PCR amplification using a unique  
250 Illumina multiplex read index for each library (adapter and primer sequences were as  
251 described in Bagley *et al.* 2017). After verifying library quality using a Bioanalyzer 2100  
252 (Agilent, Santa Clara, CA), we sent all 10 libraries to the University of Illinois Urbana-  
253 Champaign Roy J. Carver Biotechnology Center (Urbana, IL), where the libraries were  
254 pooled and sequenced using 100-bp single-end reads on two Illumina HiSeq2500 lanes.  
255 In total, we generated 400,621,900 reads.

256 We demultiplexed and quality-filtered raw reads using the protocol described in  
257 Bagley *et al.* 2017. We then used Samtools v0.1.19 (Li *et al.* 2009) to map our reads to  
258 our *N. lecontei* reference genome (Vertacnik *et al.* 2016) and STACKS v1.37 (Catchen *et*  
259 *al.* 2013) to extract loci from our reference alignment and to call SNPs. We called SNPs  
260 in two different ways. First, for interval mapping analyses, our goal was to recover  
261 markers that represented fixed differences between the grandparental lines. To do so, we  
262 first called SNPs in our eight grandparents and 10 F<sub>1</sub> mothers. For these 18 individuals,  
263 which included both haploid males and diploid females, we required that SNPs had a  
264 minimum of 7x coverage and no more than 12% missing data. We then examined the  
265 resulting grandparental and F<sub>1</sub> genotypes to compile a list of SNPs that represented fixed  
266 differences between the two populations and, as an additional quality check, confirmed  
267 that all F<sub>1</sub> females were heterozygous at these SNPs. We then used STACKS to call SNPs  
268 in the F<sub>2</sub> haploid males, requiring that each SNP had a minimum of 5x coverage (we  
269 required a lower coverage for haploid males because we did not need to distinguish  
270 between homozygous and heterozygous genotype calls), no more than 10% missing data,  
271 and was present in the curated list produced from the grandparents. Filtering in STACKS  
272 produced a total of 559 SNPs genotyped in 429 F<sub>2</sub> males.

273 Second, to maximize the number of SNPs available for GWA mapping analyses  
274 and genome scaffolding, we ran an additional STACKS run using only the F<sub>2</sub> haploid  
275 males, requiring that each SNP had a minimum of 4x coverage. By removing the  
276 requirement that SNPs were called in all grandparents, we could recover many more  
277 SNPs. We then filtered the data in VCFtools v0.1.14 (Danecek *et al.* 2011) to remove  
278 individuals with a mean depth of coverage less than one, retaining 408 F<sub>2</sub> males. After  
279 removing low-coverage individuals, we used VCFtools to remove sites with a minor  
280 allele frequency (MAF) less than 0.05 (as these are unlikely to recover significant  
281 genotype-phenotype associations), sites with >5 heterozygotes (in haploid males, high  
282 heterozygosity is a clear indication of genotyping error), and sites with more than 50%  
283 missing data. To examine the impact of data completeness threshold and SNP number on  
284 our GWA mapping results, we also produced MAF- and heterozygote-filtered datasets  
285 with more stringent (0% missing data) and less stringent (<75% missing data)

286 completeness filters. In total, our three filtered datasets contained 1205 SNPs (0%  
287 missing data), 3069 SNPs (<50% missing data), and 4162 SNPs (<75% missing data).

288

### 289 **Linkage map construction and genome scaffolding**

290 To construct a linkage map for interval mapping, we started with 559 SNPs  
291 scored in 429 F<sub>2</sub> males. After an additional round of filtering in R/qtl (Broman and Sen  
292 2009), we removed 11 haploid males that had >50% missing data, for a total of 418 F<sub>2</sub>  
293 males. Additionally, after removing SNPs that were genotyped in <70% of individuals,  
294 had identical genotypes to other SNPs, and had distorted segregation ratios, we recovered  
295 a final dataset of 503 SNPs. To assign these markers to linkage groups, we then used the  
296 “formLinkageGroups” function, requiring a minimum logarithm of odds (LOD) score of  
297 6.0 and a maximum recombination frequency of 0.35. To order markers on linkage  
298 groups, we used the “orderMarkers” function, with the Kosambi mapping function to  
299 allow for crossovers. Following this initial ordering, we performed rippling on each  
300 linkage group to check whether switching marker order could improve LOD scores.

301 Anchoring genome scaffolds to linkage groups requires that scaffolds contain  
302 markers in the genetic linkage map. Our initial map included 503 SNPs spread across 358  
303 scaffolds (out of 4523 scaffolds; Vertacnik *et al.* 2016). To increase the number of  
304 scaffolds and bases that we could place on our linkage groups, we therefore performed  
305 additional linkage mapping analyses with a larger SNP dataset that was called in F<sub>2</sub> males  
306 without any constraints on parental genotypes (filtered to remove individuals with depth  
307 of coverage < 1 and sites with MAF<0.05%, missing data > 50%, and >5 heterozygotes;  
308 remaining heterozygous sites were then treated as missing data). We then constructed a  
309 linkage map for each of our four grandparental families (N = 54, 73, 120, and 161).

310 For each grandparental family, we first performed additional data filtering in R/qtl  
311 to remove duplicate SNPs, SNPs with >50% missing data, and SNPs with distorted  
312 segregation ratios (which enabled us to remove SNPs that were monomorphic within  
313 families or that did not segregate in all of the F<sub>2</sub> families from a given grandparental  
314 pair). We then used the “formLinkageGroups” command, variable LOD thresholds  
315 (range: 5-15), and a maximum recombination frequency of 0.35. Because SNPs were not  
316 coded according to grandparent of origin, many alleles were “switched”. We therefore  
317 performed an iterative process of linkage group formation, visualization of pairwise  
318 recombination fractions and LOD scores (“plotRF” command), and allele switching  
319 (“switchAlleles” command) until we obtained seven linkage groups (the number of *N.*  
320 *lecontei* chromosomes; Smith 1942, Maxwell 1958; Sohi and Ennis 1981) and a  
321 recombination/LOD plot indicative of linkage within, but not between, linkage groups. At  
322 this point, we ran into a second dilemma—with a denser panel of SNPs, allele ordering  
323 and examination of alternative SNP orders became prohibitively slow in R/qtl. To  
324 overcome this limitation, we used the more efficient MSTmap algorithm, implemented in  
325 R/ASMap v0.4-7 (Taylor and Butler 2017), to order our markers along their assigned  
326 linkage groups.

327 Finally, to order and orient our genome scaffolds along linkage groups  
328 (chromosomes), we used ALLMAPS (Tang *et al.* 2015) to combine information from our  
329 five maps (initial map with all individuals, but limited markers; plus four additional  
330 maps, each with more markers, but fewer individuals). Because maps constructed from



331 larger families are likely to be more accurate than those constructed from small families,  
332 we weighted the maps according to their sample sizes.

333

### 334 **Interval mapping analysis**

335 After linkage map construction, we used R/qtl to map QTL for our two color  
336 traits. Based on our phenotypic analyses, we included F<sub>1</sub> mother and head capsule size as  
337 covariates in our analysis of spotting and no covariates in our analysis of yellow. For  
338 each trait, we performed interval mapping using multiple imputation mapping. We first  
339 used the “sim.geno” function with a step size of 0 (*i.e.*, genotypes only drawn at marker  
340 locations) and 64 replicates. We then used the “stepwiseqtl” command to detect QTL and  
341 select the multiple QTL model that optimized the penalized LOD score (Broman,  
342 Manichaikul *et al.* 2009). To obtain penalties for the penalized LOD scores, we used the  
343 “scantwo” function to perform 1,000 permutations under a two-dimensional, two-QTL  
344 model that allows for interactions between QTL and the “calc.penalties” function to  
345 calculate penalties from these permutation results, using a significance threshold of  $\alpha =$   
346 0.05. Finally, for each QTL retained in the final model, we calculated a 1.5-LOD support  
347 interval.

348

### 349 **Polygenic association mapping analysis**

350 Although interval mapping has long been the analysis of choice for QTL mapping  
351 in experimental crosses, a growing number of studies are employing regression based  
352 approaches that were originally developed for genome-wide association mapping studies  
353 (Yi and Banerjee 2009; Huang *et al.* 2015; Li *et al.* 2017). For example, in a recent study  
354 of the genetic architecture of stickleback brain size, Li and colleagues (2017)  
355 demonstrated that compared to a traditional interval mapping approach, a polygenic  
356 modeling approach had increased statistical power for QTL detection, a reduced false  
357 positive rate, was better able to handle a large number of markers, and provided  
358 parameter estimates describing trait genetic architecture (genomic heritability). Given  
359 that our overall goal is to compare trait genetic architectures, the ability to estimate  
360 parameters describing trait genetic architecture is an especially attractive feature of  
361 polygenic association mapping approaches.

362 With these advantages in mind, we used GEMMA v0.94.1 to fit a Bayesian  
363 Sparse Linear Mixed Model (BSLMM) to our data (Zhou *et al.* 2013). The BSLMM is  
364 essentially a hybrid between a polygenic linear mixed model (LMM) and polygenic  
365 sparse regression model, which make opposing assumptions regarding trait genetic  
366 architecture: whereas LMMs generally assume that all genetic variants impact the  
367 phenotype, with normally distributed effect sizes, sparse regression models assume that  
368 only a small proportion of variants impact the phenotype. In combining these approaches,  
369 the BSLMM enables the genetic architecture to be estimated from the data and, as a  
370 consequence, performs well across a wide range of genetic architectures. This approach  
371 can also control for uneven relatedness among samples (*e.g.*, due to population  
372 stratification or, in our case, different grandparents and mothers) via inclusion of a  
373 relatedness matrix.

374 To ensure that our phenotypic data fit the model assumptions, both larval color  
375 traits were normal-quantile transformed in R prior to analysis. Additionally, because  
376 GEMMA cannot include covariates when fitting the BSLMM, we controlled for head

377 capsule size via analyzing the residuals of the linear regression between head capsule size  
378 and spotting (variation among mothers was controlled for via inclusion of a relatedness  
379 matrix). The GEMMA algorithm also requires complete (or imputed) genotype data. To  
380 explore the robustness of our genetic architecture results to different SNP numbers and  
381 missingness thresholds, we ran GEMMA analyses for each of the three SNP datasets  
382 generated from our F<sub>2</sub> males (no missing data, <50% missing data, and <75% missing  
383 data). For each of the two datasets that contained missing genotypes, we imputed missing  
384 data with BIMBAM v1.0 (Scheet and Stephens 2006) and used the resulting “best guess  
385 genotype” in our GEMMA analyses. File conversion between different input formats was  
386 accomplished via a combination of VCFtools v0.1.14 (Danecek *et al.* 2011), PLINK  
387 v1.90b3.46 (Purcell *et al.* 2007), and FCGene v1.0.7 (Roshyara and Scholz 2014).

388 For both traits and each of the three SNP datasets (six datasets total), we  
389 performed 10 independent GEMMA runs with the “-bslmm 1” option, each consisting of  
390 25 million generations, with the first five million generations discarded as burn-in. To  
391 ensure convergence on the posterior distribution, we confirmed that parameter estimates  
392 were similar across independent runs and that parameter traces did not show any obvious  
393 increasing or decreasing trends. For each dataset, we then averaged posterior inclusion  
394 probabilities (PIP) for each SNP across all 10 runs and used the R package “qqman”  
395 (Turner 2014) to generate Manhattan plots from the averaged PIPs. To identify the most  
396 promising candidate SNPs, we ranked SNPs by their PIP scores and retained the top 1%  
397 for each dataset. We calculated the total effect size for each SNP in each run as:  $\beta_i\gamma_i + \alpha_i$   
398 (Zhou *et al.* 2013), then averaged effect size estimates across the 10 independent runs to  
399 obtain a single effect size estimate for each SNP and dataset.

400 We also summarized parameter estimates describing trait genetic architecture,  
401 including percent variance explained (PVE), percent of genetic variance that is due to  
402 large (or “sparse”) effect alleles (PGE), and the number of SNPs in the polygenic model  
403 (“n\_gamma” in GEMMA output). After ensuring that results were similar across  
404 independent runs, we computed medians and 95% credible intervals for the combined  
405 posterior distributions derived from all 10 runs (each consisting of 20 million post-burnin  
406 generations sampled every 1,000 generations, or 20,000 samples per run) for each  
407 parameter and each of our three SNP datasets.

408 Using our GEMMA results, we evaluated the pigmentation/pattern hypothesis in  
409 two ways. First, we asked whether the magnitudes of the estimated effect sizes for the  
410 largest-effect SNPs were consistently higher for yellow than for spotting. To obtain effect  
411 size magnitudes, we first calculated the absolute value of the average effect size for each  
412 SNP (across 10 independent runs), then used these values to calculate for each dataset the  
413 maximum effect size and median effect size for top 1% SNPs. Then, for each of the three  
414 SNP datasets, we used a nonparametric Wilcoxon rank-sum test to evaluate the null  
415 hypothesis that the effect sizes for the top 1% SNPs are equal across the two traits.  
416 Second, we used the genetic architecture parameter posterior distributions to evaluate the  
417 prediction that the percentage of genetic variance attributable to alleles of non-negligible  
418 effects (PGE) will be higher for yellow than for spotting.

419

#### 420 **Candidate gene analysis**

421 To identify candidate QTL regions, we looked for regions of overlap between  
422 R/qtl and GEMMA analyses. We first identified the 1.5-LOD support interval

423 surrounding each QTL identified via interval mapping analyses. Then, we expanded this  
424 interval to include any candidate SNPs identified by GEMMA (*i.e.*, PIP scores in 99<sup>th</sup>  
425 percentile) that were within 1.5 Mb (which corresponds to ~5cM, see results) of either  
426 end of this QTL interval. Next, we used our anchored genome scaffolds to compile a list  
427 all scaffolds that fell within the physical intervals defined by the combined GEMMA and  
428 R/qtl results. Finally, we compiled a list of all remaining scaffolds with SNPs identified  
429 as candidates in our GEMMA analyses.

430 After compiling candidate regions in the *N. lecontei* genome, we compiled a list  
431 of candidate color genes. For larval spotting, we included genes in the melanin synthesis  
432 pathway and genes that have been implicated in pigment patterning (Wittkopp *et al.*  
433 2003; Protas and Patel 2008; Wittkopp and Beldade 2009; Sugumaran and Barek 2016).  
434 For larval pigmentation, we included genes implicated in the transport, deposition, and  
435 processing of carotenoid pigments derived from the diet (Palm *et al.* 2012; Yokoyama *et al.*  
436 2013; Tsuchida and Sakudoh 2015; Toews *et al.* 2017). Although several pigments  
437 can produce yellow coloration in insects (*e.g.*, melanins, pterins, ommochromes, and  
438 carotenoids), we focused on carotenoids because a heated pyridine test (McGraw *et al.*  
439 2005) was consistent with carotenoid-based coloration in *N. lecontei* larvae (Figure S1).

440 Once we had compiled a list of candidate genes, we searched for these genes by  
441 name in the *N. lecontei* v1.0 genome assembly and NCBI annotation release 100  
442 (Vertacnik *et al.* 2016). To find missing genes and as an additional quality measure, we  
443 obtained FASTA files corresponding to each candidate protein and/or gene from NCBI  
444 (using *Apis*, *Drosophila melanogaster*, or *Bombyx mori* sequences, depending on  
445 availability). We then used the i5k Workspace@NAL (Poelchau *et al.* 2014) BLAST  
446 (Altschul *et al.* 1990) web application to conduct tblastn (for protein sequences) or tblastx  
447 (for gene sequences) searches against the *N. lecontei* v1.0 genome assembly, using  
448 default search settings. After identifying the top hit for each candidate gene/protein, we  
449 then used the WebApollo (Lee *et al.* 2013) JBrowse (Skinner *et al.* 2009) *N. lecontei*  
450 genome browser to identify the corresponding predicted protein coding genes (from  
451 NCBI annotation release 100) in the *N. lecontei* genome.

452 We took additional steps to identify genes in the *yellow* gene family, all of which  
453 contain a major royal jelly protein (MRJP) domain. First, we used the search string  
454 “major royal jelly protein *Neodiprion*” to search the NCBI database for all predicted  
455 *yellow*-like and *yellow-MRJP*-like *N. lecontei* genes. We then downloaded FASTA files  
456 for the putative *yellow* gene sequences (26 total). Next, we used the Hymenoptera  
457 Genome Database (Elsik *et al.* 2016) to conduct a blastx search of our *N. lecontei* gene  
458 sequence queries against the *Apis mellifera* v4.5 genome NCBI RefSeq annotation release  
459 103. Finally, we recorded the top *A. mellifera* hit for each putative *N. lecontei yellow*  
460 gene.

461 Once we identified the location of candidate color genes in the *N. lecontei*  
462 genome, we asked whether any of these genes were located within scaffolds contained  
463 within our candidate QTL intervals.

464

#### 465 **Data availability**

466 Short-read DNA sequences will be made available via the NCBI SRA (Bioproject  
467 PRJNA#####, Biosample numbers SAMN#####-SAMN#####). The linkage-  
468 group anchored assembly will be submitted to NCBI and i5k to update the existing *N.*

469 *lecontei* genome assembly and annotations (Vertacnik *et al.* 2016). All remaining files  
470 (phenotypic data, SNP datasets, and input files for R/qtl and GEMMA) will be submitted  
471 to DRYAD (doi:#####).

472  
473  
474

## RESULTS AND DISCUSSION

### 475 **Phenotypic variation**

476 Lab-reared larvae derived from the two founding populations (white-bodied, dark  
477 spotted VA population and the yellow-bodied, light spotted MI population) differed  
478 significantly from one another in both pigmentation and spotting pattern (Figures 2, 3;  
479 yellow:  $t_{42} = 63.52$ ,  $P < 1 \times 10^{-15}$ ; spotting:  $t_{41.68} = 23.13$ ,  $P < 1 \times 10^{-15}$ ). Because all  
480 larvae were reared on the same host under the same laboratory conditions (*i.e.*, minimal  
481 environmental variance), these results suggest that genetic variance contributes to  
482 variance in both larval color traits. Crosses between the VA and MI lines produced  
483 diploid F<sub>1</sub> females that appeared intermediate in both pigmentation and spotting pattern  
484 (Figure 2), and F<sub>1</sub> female larvae differed significantly from both parents for both traits  
485 (Figure 3; yellow MI vs. F<sub>1</sub>:  $t_{51.65} = 15.41$ ,  $P < 1 \times 10^{-15}$ ; yellow VA vs. F<sub>1</sub>:  $t_{66.29} = 18.26$ ,  
486  $P < 1 \times 10^{-15}$ ; spotting MI vs. F<sub>1</sub>:  $t_{52.33} = 10.52$ ,  $P = 1.63 \times 10^{-14}$ ; spotting VA vs. F<sub>1</sub>:  $t_{68.37}$   
487  $= 2.92$ ,  $P = 0.0047$ ). These results indicate that neither pigmentation phenotype (white vs.  
488 yellow) and neither spotting phenotype (light vs. dark) is completely dominant.

489 Haploid F<sub>2</sub> males produced by virgin F<sub>1</sub> mothers varied continuously in both  
490 spotting and pigmentation, and differed significantly from the two founding populations  
491 in both traits (Figure 3; yellow MI vs. F<sub>2</sub>:  $t_{427.06} = 42.55$ ,  $P < 1 \times 10^{-15}$ ; yellow VA vs. F<sub>2</sub>:  
492  $t_{167.05} = 8.05$ ,  $P = 1.48 \times 10^{-13}$ ; spotting MI vs. F<sub>2</sub>:  $t_{165.28} = 20.85$ ,  $P < 1 \times 10^{-15}$ ; spotting  
493 VA vs. F<sub>2</sub>:  $t_{53.49} = 8.20$ ,  $P = 4.96 \times 10^{-11}$ ). F<sub>2</sub> males also differed significantly from F<sub>1</sub>  
494 females in pigmentation, but not spotting (yellow F<sub>1</sub> vs. F<sub>2</sub>:  $t_{91.69} = 11.61$ ,  $P < 1 \times 10^{-15}$ ;  
495 spotting F<sub>1</sub> vs. F<sub>2</sub>:  $t_{56.79} = 1.87$ ,  $P = 0.066$ ). We also found a weak, but significant and  
496 negative correlation between spotting area and percent yellow in F<sub>2</sub> males (*i.e.*, yellower  
497 individuals tend to be less heavily spotted; Pearson's  $r = -0.12$ ,  $P = 0.013$ ). This  
498 correlation, which could be explained by pleiotropy or physical linkage, suggests that  
499 these two traits do not evolve completely independently of one another. Nevertheless, the  
500 correlation is relatively weak and we observed many different combinations of spotting  
501 and pigmentation in the recombinant F<sub>2</sub> males (Figure 2).

502 Because F<sub>2</sub> males are haploid, interactions between alleles at a single locus  
503 (dominance effects) are eliminated. Thus, the range of phenotypic variation observed in  
504 F<sub>2</sub> males is determined by the number and effect sizes of color alleles and epistatic  
505 interactions between them. For both color traits, phenotypic variation observed in the F<sub>2</sub>  
506 males spanned—and even exceeded—the full range of variation observed in the  
507 grandparental populations and F<sub>1</sub> females (Figure 3). The observation that grandparental  
508 pigmentation and spotting phenotypes are recapitulated in the F<sub>2</sub> males suggests that both  
509 traits are controlled by a relatively small number of loci. There are multiple, non-  
510 mutually exclusive explanations for the transgressive color phenotypes in our haploid F<sub>2</sub>  
511 males, including: variation in the grandparental lines, reduced developmental stability in  
512 hybrids, epistasis, unmasking of recessive alleles in haploid males, and the  
513 complementary action of additive alleles from the two grandparental lines (Rieseberg *et*  
514 *al.* 1999).

515

## 516 **Linkage mapping and genome scaffolding**

517 For our full F<sub>2</sub> SNP dataset, which consisted of 503 fixed differences scored in  
518 429 F<sub>2</sub> haploid males, our markers were spread across seven linkage groups (LG), which  
519 matches the number of *N. lecontei* chromosomes (Smith 1941; Maxwell 1958; Sohi and  
520 Ennis 1981). The total map length was 1169 cM, with an average marker spacing of 2.4  
521 cM and maximum marker spacing of 24.3 cM (Table S1; Figure S2). Together, these  
522 results indicate that this linkage map is of sufficient quality and coverage for interval  
523 mapping. Additionally, with an estimated genome size of 340 Mb (estimated via flow  
524 cytometry; C. Linnen, personal observation), these mapping results yield a recombination  
525 density estimate of 3.43 cM/Mb. This recombination rate is lower than that observed in  
526 social Hymenoptera, which have among the highest rates of recombination in eukaryotes  
527 (Wilfert *et al.* 2007). Nevertheless, this rate is on par with that reported in other (non-  
528 eusocial) hymenopterans, which lends support to the hypothesis that elevated  
529 recombination rates in eusocial hymenopterans species is a derived trait and possibly an  
530 adaptation to a social lifestyle (Gadau *et al.* 2000; Schmid-Hempel 2000; Crozier and  
531 Fjerdingstad 2001).

532 Linkage maps estimated for the four grandparental families, each of which  
533 contained >2000 markers, ranged in length from 1072 cM to 3064 cM (Table S1). This  
534 variation in map length is likely attributable to both decreased mapping accuracy in  
535 smaller families and decreased genotyping accuracy in these less-stringently filtered SNP  
536 datasets. Nevertheless, our scaffolding analysis revealed that marker ordering was highly  
537 consistent across linkage maps (Figures S3-S9). Additionally, via including SNPs that  
538 were variable only in some families, we were able to more than triple the number of  
539 mapped scaffolds (from 358 to 1005) and increase the percentage of mapped bases from  
540 41.2% to 78.9% (Tables S2-S3). Anchored genome scaffolds, coupled with existing *N.*  
541 *lecontei* gene annotations, are a valuable resource for identification of candidate genes  
542 within QTL.

543

## 544 **Detection of color QTL via interval and polygenic association mapping**

545 Using an interval mapping approach, we obtained significant QTL for both traits.  
546 For yellow, the full stepwise model recovered six QTL, with a significant interaction  
547 between QTL on LGs 3 and 5 (Table 1; Figure 4A). This model, which had a LOD  
548 (logarithm of the odds) score of 182.03, explained 85.8% of the total variance in larval  
549 pigmentation. The two largest-effect QTL (Yellow-4 and Yellow-5) reside on LGs 3 and  
550 5, each explaining ~16% of the variance in larval pigmentation. These QTL also  
551 accounted for a substantial fraction of the phenotypic difference between the  
552 grandparental lines (Yellow-4: 27%; Yellow-5: 52%; Table 1, Figure 4A, Figure 5A-B),  
553 and the interaction between these two QTL was highly significant ( $P = 6.5 \times 10^{-14}$ , Figure  
554 5C). Examination of the interaction plot reveals that individuals carrying the VA allele  
555 for the Yellow-5 QTL have drastically reduced yellow pigmentation, making the  
556 additional impact of the Yellow-4 QTL less pronounced (Figure 5C). Possible reasons  
557 why the effects of the Yellow-4 “VA-white” allele are most pronounced on the Yellow-5  
558 “MI-yellow” background are considered further in our discussion of candidate genes.

559 For spotting, we detected only two QTL via interval mapping, both of which were  
560 located on LG 2 (Table 1, Figure 4C). The first peak (Spot-1) explained 13% of the

561 phenotypic variance in F<sub>2</sub> males and 35% of the difference in spotting between the  
562 grandparental strains (Figure 5D). The second peak (Spot-2) explained 35% of the  
563 variance in F<sub>2</sub> males and 57% of the difference in yellowness between the grandparents  
564 (Figure 5E). The full stepwise model, which included head capsule area and mother as  
565 covariates, had a LOD score of 94.9 and explained 64.0% of the total variance in larval  
566 spotting pattern. This model also included a subtle, but significant ( $P = 0.0051$ )  
567 interaction between the two spotting QTL. Specifically, the effects of the dark-spotting  
568 VA allele for the Spot-1 QTL are more pronounced on a genetic background containing  
569 the dark-spotting VA allele for the Spot-2 QTL (Figure 5F). Notably, the 1.5-LOD  
570 support intervals for the two large-effect spotting QTL overlap with those of two small-  
571 effect yellow QTL (Yellow-2 and Yellow-3) (Table 1). This co-localization of spotting  
572 and yellow QTL is consistent with the weak phenotypic correlation observed between  
573 these traits in F<sub>2</sub> males.

574 We also recovered strong associations between genotype and phenotype for both  
575 traits using a polygenic association mapping approach. Because effect sizes, PIP  
576 estimates, and genetic architecture parameter estimates were highly consistent across  
577 independent GEMMA runs (Table S4), we combined results from each set of 10 runs by  
578 (1) averaging per-SNP PIP and effect scores across runs, and (2) combining parameter  
579 posterior distributions into a single distribution for each trait/SNP dataset. Overall, there  
580 was considerable overlap between the location of QTL indicated by the GEMMA  
581 analyses and those implicated by interval mapping analyses (Figure 4, Tables S5-S6).  
582 Specifically, GEMMA analyses recovered candidate SNPs in or in close proximity to  
583 (*i.e.*, within 1.5 million base pairs or < 5 cM) all QTL intervals identified by interval  
584 mapping (Tables S5-S6). Moreover, QTL with high LOD scores had correspondingly  
585 high PIP estimates (PIP > 0.80). That said, the precise location of the QTL peaks (highest  
586 LOD score or PIP value) differed slightly among interval mapping and GEMMA  
587 analyses and among GEMMA analyses utilizing different missing data thresholds. These  
588 differences are likely attributable to differences in the SNPs included in the analysis (*e.g.*,  
589 many SNPs in GEMMA analyses with 50% and 75% missing data were not present in the  
590 0%-missing GEMMA and R/qtl analyses). Additionally, the stringently curated R/qtl and  
591 0% missing GEMMA datasets are less likely to contain genotyping error that may  
592 obscure genotype-phenotype associations.

593 In addition to the eight color QTL detected via interval mapping, GEMMA  
594 analyses identified several additional regions of the genome associated with larval color  
595 variation (Tables S5-S6). Although the 99<sup>th</sup> percentile PIP threshold is somewhat  
596 arbitrary, it is nevertheless quite stringent. Depending on the dataset, our top 1% PIP  
597 scores represented a 3- to 340-fold increase over the genome-wide average PIP value.  
598 Although it is certainly possible that the GEMMA candidate SNPs represent false  
599 positives, identification of plausible candidate genes linked to at least some of these SNPs  
600 suggests that at least some GEMMA candidates may represent true positives (see below).  
601 One possible explanation for why GEMMA picked up regions that were not detected via  
602 interval mapping is that these regions contain genetic variants contributing to phenotypic  
603 variation segregating within one of the grandparental lines. Additionally, compared to the  
604 one- and two-SNP scans implemented in interval mapping analyses, the multi-SNP  
605 association mapping method implemented in GEMMA may have more power to detect  
606 QTL of small effect. This explanation is consistent with the observation that, compared to

607 single-SNP GWA mapping approaches, multiple-SNP GWA mapping approaches have  
608 increased power and reduced false positive rates (Hoggart *et al.* 2008).

609

### 610 **Comparing genetic architectures: testing the pigmentation/patterning hypothesis**

611 According to the pigmentation/pattern hypothesis, pigmentation loci are less  
612 likely to involve negative pleiotropic consequences and therefore, the distribution of  
613 effect sizes underlying changes in pigmentation (yellow) should be shifted towards large-  
614 effect mutations compared to the effect-size distribution of patterning (spotting) (Fisher  
615 1930; Rockman 2012). Although limited power to detect QTL of very small effect  
616 precludes us from estimating the exact number of SNPs and full effect-size distribution,  
617 we can nevertheless ask whether there are any obvious differences between the upper  
618 ends of the effect-size distributions for different traits scored in the same mapping  
619 population.

620 Looking first at the interval mapping analyses, the number of QTL of relatively  
621 large effect is the same for both traits: for both yellow and spotting, there are two QTL  
622 with PVE > 10% and phenotypic effect sizes that exceed 25% of phenotypic difference  
623 between the grandparental lines. However, in contrast to our predictions, the QTL with  
624 the largest observed effect size was for spotting (Spot-1), not yellow. Additionally, more  
625 QTL are detected for yellow than for spotting, which could indicate that the genetic  
626 architecture of yellow is more complex (more loci) than that of spotting. These  
627 observations are seemingly at odds with the prediction that the effect-size distribution for  
628 yellow should be shifted towards large-effect QTL. That said, an alternative  
629 interpretation for our finding that fewer QTL were detected for spotting is that most  
630 spotting QTL were not of sufficient effect size for detection. Thus, our observation of  
631 more yellow QTL could be explained by an effect-size distribution that is shifted towards  
632 larger effects (*i.e.*, there more QTL of sufficient size for detection). Taken together, our  
633 interval mapping results are equivocal with respect to the pigmentation/patterning  
634 hypothesis.

635 In contrast to the interval mapping results, effect size estimates from the GEMMA  
636 analyses are largely consistent with the predictions of the pigmentation/pattern  
637 hypothesis. Across all SNP datasets, the effect size of the largest-effect SNP was always  
638 higher for yellow than for spotting (Table 2). Likewise, the median effect size for SNPs  
639 that fell within the 99<sup>th</sup> percentile for PIP was consistently higher for yellow than for  
640 spotting. However, none of the Wilcoxon rank-sum tests comparing the distribution of  
641 the top 1% effect sizes were significant (0% missing data:  $N = 13$  SNPs,  $W = 105$ ,  $P =$   
642  $0.31$ ; <50% missing data:  $N = 31$  SNPs,  $W = 505$ ,  $P = 0.74$ ; <75% missing data:  $N = 42$   
643 SNPs,  $W = 1000$ ,  $P = 0.29$ ). That said, the PIP cutoff was somewhat arbitrary and the  
644 number of SNPs analyzed was relatively small.

645 By providing parameter estimates that describe trait genetic architecture and are  
646 independent of arbitrary cutoffs, the BSLMM implemented in GEMMA provides a more  
647 straightforward way to compare trait genetic architectures. Despite some dependence on  
648 the SNP dataset analyzed, among-trait differences in PVE and PGE were very consistent  
649 across runs (Figure 6A-B; Table 2). First, the amount of phenotypic variation explained  
650 by genetic variance was consistently higher for yellow, mirroring our interval mapping  
651 results (PVE for full yellow model: 85.8%; PVE for full spotting model: 64.0%).  
652 Moreover, for the 0%-missing dataset, 95% credible intervals for PVE for the two traits

653 did not overlap (Table 2). Possible explanations for differences in PVE include a greater  
654 measurement error for spotting and/or a greater contribution of environmental variance to  
655 spotting variance. Second, although estimates of the contribution of large-effect  
656 mutations to total genetic variance were high for both traits ( $PGE > 0.8$ ), yellow PGE  
657 estimates were uniformly higher than spotting PGE estimates and, for the 0%-missing  
658 dataset, 95% credible intervals for PGE did not overlap (Table 2). Our observed  
659 differences in PGE estimates are consistent with the prediction that, compared to  
660 spotting, the effect-size distribution underlying the yellow trait is shifted towards  
661 mutations of larger effect.

662 In contrast to PVE and PGE, we did not observe consistent differences in the  
663 estimated number of large-effect SNPs across the three datasets and 95% credible  
664 intervals for this parameter always overlapped. For the 0%-missing and 50%-missing  
665 datasets, yellow had slightly more SNPs than spotting, but spotting had more SNPs than  
666 yellow in the 75%-missing datasets (Table 2). Additionally, for all three SNP datasets,  
667 yellow and spotting had very similar posterior distributions for SNP number (Figure 6C).  
668 Nevertheless, despite some uncertainty in our SNP number estimates, our effect size  
669 estimates and PGE estimates obtained under the BSLMM implemented in GEMMA  
670 provide support for the pigmentation/pattern hypothesis.

671

### 672 **Limitations of our data for testing the pigmentation/pattern hypothesis**

673 Although our genetic architecture parameter estimates are consistent with the  
674 prediction that the effect-size distribution is shifted towards large-effect alleles for  
675 pigmentation, there are three main limitations of our current data that preclude a more  
676 definitive test of the pigmentation/pattern hypothesis. First and foremost, we have  
677 mapped these traits to large genomic regions, each containing many genes (~2 – 3.5 Mb  
678 for the four QTL of largest effect; 2.2 – 7.7 Mb for remaining smaller-effect QTL). It is  
679 therefore possible that individual QTL comprise multiple linked mutations of individually  
680 smaller effect (Stam and Laurie 1996; McGregor *et al.* 2007; Bickel *et al.* 2011; Linnen  
681 *et al.* 2013). With this in mind, our effect sizes and PGE estimates are best interpreted as  
682 maximum values for each trait. Under the pigmentation/pattern hypothesis, we would  
683 predict that spotting QTL are more likely to fractionate than yellow QTL. Moreover, if  
684 patterning traits involve loci that are more likely to exhibit antagonistic pleiotropy than  
685 loci involved in pigmentation traits, we would expect to see a greater contribution of cis-  
686 regulatory changes—possibly multiple linked cis-regulatory changes (*e.g.*, Rebeiz *et al.*  
687 2009; Frankel *et al.* 2011)—to variation in spotting compared to variation in yellow.  
688 These predictions could be tested via fine-mapping QTL and functional analysis of  
689 candidate genes and mutations (see below).

690 A second limitation of our data is that there are many other factors beyond  
691 antagonistic pleiotropy that can impact the expected distribution of mutational effect  
692 sizes, including the demographic and selective history of the phenotypically divergent *N.*  
693 *lecontei* populations. In terms of selection, theoretical predictions regarding the expected  
694 distribution of effect sizes are all based on model of adaptation in which beneficial  
695 mutations are fixed as a population moves towards a new phenotypic optimum (Orr  
696 1998). A key assumption, therefore, is that the traits under investigation are adaptive. For  
697 *N. lecontei*, experimental evidence indicates that both white and yellow larvae are



698 highly conspicuous to avian predators when viewed against a background of pine foliage,  
699 and both morphs facilitate rapid avoidance learning in naïve avian predators (Lindstedt  
700 and Linnen, personal observation). Consistent with theoretical predictions that avoidance  
701 learning in predators will result in stabilizing selection on warning coloration (Joron and  
702 Mallet 1998; Kapan 2001; Kronforst and Gilbert 2008), most *N. lecontei* populations are  
703 fairly uniform in their color and pattern (Linnen, personal observation). Although  
704 stabilizing selection can explain the maintenance of larval color differences between *N.*  
705 *lecontei* populations in the face of gene flow, it does not explain the initial divergence in  
706 color. One possibility is that initial color differences arose via genetic drift in small  
707 populations that were isolated in pine refugia during the Pleistocene glaciations (Bagley  
708 *et al.* 2017). Once a novel morph reached a critical threshold to promote avoidance  
709 learning in the local predator community, it could then increase in frequency via selection  
710 (Mallet and Singer 1987; Turner and Mallet 1996; Kronforst and Gilbert 2008). A non-  
711 mutually exclusive explanation is that among-population differences in larval color stem  
712 from geographic variation in other selection pressures, such as climate, host-plant  
713 defenses, and local communities of viruses, parasitoids, and predators (Nokelainen *et al.*  
714 2014, Amézquita *et al.* 2017, Willmott *et al.* 2017).

715 Beyond demonstrating that a particular trait is adaptive, other details of the  
716 selective history are also important to predicting effect-size distributions. For example,  
717 theoretical work indicates that adaptation to a distant phenotypic optimum, adaptation to  
718 a rapidly moving optimum, adaptation to a multi-peaked fitness surface, and adaptation  
719 from new beneficial mutations can all shift the predicted effect-size distribution towards  
720 mutations of larger effect (Orr 1998; Hermisson and Pennings 2005; Matuszewski *et al.*  
721 2014, 2015; Dittmar *et al.* 2016). In short, additional work is needed to test our  
722 assumption that larval color traits are locally adaptive and to more fully explore the  
723 targets, agents, and history of selection on larval color traits. We note, however, that even  
724 if larval color evolution is predominantly neutral, we would still expect pleiotropy to  
725 impact the expected distribution of effect sizes of color mutations fixed under genetic  
726 drift. For example, for a highly pleiotropic gene, large-effect alleles are more likely to be  
727 deleterious than small-effect alleles and therefore less likely to drift to fixation. Thus, if  
728 pigmentation genes are less pleiotropic, on average, than patterning genes, the  
729 pigmentation/patterning hypothesis should apply to both selected and neutrally evolving  
730 traits.

731 In terms of demographic history, theoretical work indicates that effect-size  
732 distributions will be shifted towards larger-effect mutations when effective population  
733 size is reduced (Kimura 1983) and when local adaptation is opposed by ongoing gene  
734 flow (Griswold 2006; Yeaman and Whitlock 2011). Based on a demographic analysis of  
735 genome-wide SNP data, Bagley *et al.* (2017) hypothesized that genetically distinct  
736 “North” (source of the light-spotted, yellow MI population) and “Central” (source of the  
737 dark-spotted, white VA population) lineages diverged from one another during the  
738 Pleistocene, ~25,000 years ago. Prior to this divergence, the North/Central ancestor  
739 diverged from a “South” lineage ~45,000 years ago. Using this early-diverging South  
740 lineage, which is dark-spotted and yellow, to polarize changes in larval color, we  
741 hypothesize that light spotting (MI) and white coloration (VA) are both derived character  
742 states within *N. lecontei*.

743 Compared to the Central lineage, the North lineage has drastically reduced  
744 heterozygosity and an effective population size that is estimated to be ~89% lower than  
745 that the Central  $N_e$  estimate (Bagley *et al.* 2017). Thus, beneficial light-spotting alleles of  
746 small effect would have been more likely to be lost to drift in the North lineage than in  
747 other lineages, thereby shifting the predicted effect-size distribution for spotting towards  
748 larger-effect alleles. That said, the North lineage has experienced much less gene flow  
749 from other lineages than the South and Central lineages (Bagley *et al.* 2017). The Central  
750 lineage is also polymorphic for larval pigmentation, with a cluster of white-bodied  
751 populations in the mid-Atlantic region, surrounded by genetically similar yellow-bodied  
752 populations in other portions of the Central range (Bagley *et al.* 2017; Bagley and  
753 Linnen, personal observation). Higher gene flow from yellow populations would have  
754 favored larger-effect loci underlying locally adaptive white pigmentation compared to a  
755 model lacking gene flow (Yeaman and Whitlock 2011). Consistent with these  
756 demographic estimates and theoretical predictions, we found that both spotting and  
757 yellow had high estimates for PGE (Table 2; Figure 6).

758 A third and final limitation is that, while a useful test of the *a priori* hypothesis  
759 that the effect size of alleles contributing to pigmentation are larger, on average, than  
760 those contributing to color pattern, our sample size nevertheless consists of a single  
761 population pair. As the discussion above highlights, many factors can lead to differences  
762 in trait genetic architectures and any one of these could have pushed the distribution of  
763 pigmentation alleles towards larger effects. Because the history of adaptation—and  
764 therefore the expected effect-size distribution of adaptive substitutions—is likely to be  
765 highly idiosyncratic across populations and species, many phylogenetically independent  
766 test cases will be needed to determine whether certain factors (*e.g.*, different levels of  
767 pleiotropy associated with pigmentation and color patterning loci) are consistently  
768 associated with differences in effect-size distributions.

769 To date, the most tested prediction regarding trait genetic architectures is that the  
770 distribution of effect sizes will be shifted towards large-effect mutations when the  
771 distance to the phenotypic optimum is large. This prediction has been supported in  
772 multiple contexts. For example, Rogers *et al.* (2012) estimated QTL effect sizes  
773 underlying shape and armor traits in replicate freshwater stickleback populations adapting  
774 to phenotypic optima that were either close to the ancestral phenotype (predatory prickly  
775 sculpin present) or far from the ancestral phenotype (no sculpin present). Consistent with  
776 theory, they found that average effect sizes were larger when populations were adapting  
777 to a more distant phenotypic optimum. Similarly, in specialist pupfish that have evolved  
778 from a generalist ancestor, large-effect QTL contribute more to the enlarged scale-eater  
779 jaw (distant phenotypic optimum) than to the molluscivore nasal protrusion (close  
780 phenotypic optimum) (Martin *et al.* 2017; McGirr *et al.* 2017). Extensive intra- and  
781 interspecific variation in larval pigmentation and patterning make *Neodiprion* an  
782 especially promising system for testing the pigmentation/pattern hypothesis and, more  
783 generally, examining the impact of pleiotropy on trait genetic architecture (Figure 1).

#### 784 785 **Candidate genes for larval color traits**

786 Testing the pigmentation/patterning hypothesis will ultimately require identifying  
787 causal genes and mutations and characterizing their phenotypic effects. To this end, we  
788 asked whether our candidate QTL regions contained any genes with known or suspected

789 roles in carotenoid-based or melanin-based pigmentation. For larval pigmentation  
790 (“yellow”), we focused on genes known or suspected to be involved in carotenoid  
791 processing or deposition (see Figure S1). Although most animals cannot synthesize their  
792 own carotenoids, many use environmentally acquired carotenoids to produce red, orange,  
793 and yellow colors (Toews *et al.* 2017). Compared to endogenously produced pigments  
794 such as melanin, however, much less is known about the genetic pathways underlying  
795 carotenoid based pigmentation. Nevertheless, recent progress in identifying genes  
796 involved in carotenoid transport, deposition, and processing provided us with some  
797 candidates for carotenoid-based pigmentation (Table S7). These candidates include genes  
798 encoding carotenoid binding proteins (involved in binding carotenoids in gut and  
799 transporting to hemolymph), lipoproteins (involved in carotenoid transport in  
800 hemolymph), scavenger receptor proteins (involved in carotenoid uptake in specific  
801 tissues),  $\beta$ -carotene oxygenases (involved in carotenoid breakdown), and cytochrome  
802 p450s (possibly involved in carotenoid processing) (Bhosale and Bernstein 2007; Palm *et al.*  
803 *et al.* 2012; Yokoyama *et al.* 2013; Tsuchida and Sakudoh 2015; Toews *et al.* 2017).

804 Both of our largest-effect yellow QTL contained promising candidate genes with  
805 known or suspected roles in carotenoid-based pigmentation (Table S7). First, within the  
806 overlapping Yellow-5 and Yellow-6 QTL intervals, we recovered a predicted protein  
807 coding gene in scaffold 164 with a high degree of similarity to the ApoLTP-1 and  
808 ApoLTP-2 protein subunits (encoded by the gene *apoLTP-II/I*) of the *Bombyx mori* lipid  
809 transfer particle (LTP) lipoprotein (e-value: 0; bitscore: 391). LTP is one of two major  
810 lipoproteins present in insect hemolymph and appears to be involved in the transport of  
811 lipids (including carotenoids) from the gut to the other major lipoprotein, lipophorin,  
812 which then transports lipids to target tissues (Tsuchida *et al.* 1998; Palm *et al.* 2012;  
813 Yokoyama *et al.* 2013). A second potential candidate in the overlapping Yellow-5 and  
814 Yellow-6 QTL intervals, located on scaffold 386, is a cytochrome P450. Although  
815 cytochrome P450s are best known for their role in detoxification, it is hypothesized that  
816 they serve diverse roles and at least one cytochrome p450 (*CYP2J19*) has been implicated  
817 in the conversion of yellow carotenoids to red ketocarotenoids in birds (Lopes *et al.*  
818 2016; Mundy *et al.* 2016).

819 Within the Yellow-4 QTL, we found a predicted protein coding region in scaffold  
820 518 with a high degree of similarity to the *Bombyx mori* *Cameo2* scavenger receptor  
821 protein (e-value:  $1 \times 10^{-18}$ ; bitscore: 92.8). *Cameo2* encodes a transmembrane protein  
822 belonging to the CD36 family that has been implicated in the selective transport of the  
823 carotenoid lutein from the hemolymph to specific tissues (Sakudoh *et al.* 2010; Tsuchida  
824 and Sakudoh 2015). In the silkworm *Bombyx mori*, *Cameo2* is responsible for the “C  
825 mutant” phenotype, which is characterized by a combination of yellow hemolymph and  
826 white cocoons that arises as a consequence of disrupted transport of lutein from the  
827 hemolymph to the middle silk gland (Sakudoh *et al.* 2010; Tsuchida and Sakudoh 2015).  
828 Based on this previous work, we hypothesize that a loss of function mutation in *Cameo2*  
829 contributes to the loss of yellow pigmentation in the integument of white-bodied *N.*  
830 *lecontei* larvae.

831 Our most promising yellow candidate genes—*apoLTP-II/I* and *Cameo2*—also  
832 provide a potential explanation for the epistatic interaction we detected between the  
833 Yellow-4 and Yellow-5 QTL (Figure 5C). We predict that reduced *apoLTP-II/I* function  
834 would reduce the amount of yellow carotenoids found in the hemolymph and reduced

835 *Cameo2* function would reduce yellow carotenoids in the integument. In the transport of  
836 carotenoids from the gut to the integument, *Cameo2* therefore acts downstream of  
837 *apoLTP-III*. Thus, once the amount of carotenoids entering the hemolymph is already  
838 reduced via changes in *apoLTP-III* (Yellow-5), the impact of an additional reduction in  
839 the integument via changes in *Cameo2* (Yellow-4) would be reduced—this is consistent  
840 with the interaction plot in Figure 5C.

841 Our top two spotting QTL also yielded very promising candidate genes—this time  
842 in the well-characterized melanin biosynthesis pathway. Specifically, in both peaks, we  
843 found protein-coding genes that appear to belong to the *yellow* gene family. The *yellow*  
844 gene family encodes a functionally diverse set of proteins characterized by a shared  
845 major royal jelly protein (MRJP) domain (Ferguson *et al.* 2011). To date, *yellow* genes  
846 have been associated with diverse functions, including behavior, reproductive maturation,  
847 caste specification in honeybees, and pigmentation (Wittkopp *et al.* 2002; Drapeau *et al.*  
848 2006; Prud’homme *et al.* 2006; Ferguson *et al.* 2011). Although much is still unknown  
849 about the function of *yellow* genes, studies in *D. melanogaster* suggest that *yellow-f* and  
850 *yellow-f2* have dopachrome-conversion enzymatic function, which is required for the  
851 production of melanic pigment (Han *et al.* 2002). Additionally, mapping and expression  
852 data indicate that deletions in *yellow-e* gene are responsible for changes in larval  
853 pigmentation patterning in two mutant strains of the *Bombyx mori* (Ito *et al.* 2010).

854 Among the 11,586 predicted protein coding genes in the *N. lecontei* v1.0 genome  
855 NCBI annotation release 100, we recovered 26 “*yellow-like*” or “*yellow-MRJP-like*”  
856 genes. Notably, this number is equivalent to the number of *yellow-like/yellow-MRJP-like*  
857 genes found in the genome of the jewel wasp, *Nasonia vitripennis*, which boasts the  
858 highest reported number of *yellow-like* genes of any insect to date (Werren *et al.* 2010).  
859 Of the 26 genes belonging to the *yellow* family, nine were most similar to *Apis yellow-*  
860 *MRJPs*. The remaining 17 genes appeared more similar to *Apis yellow* genes (top BLAST  
861 hits included: four *yellow-b*, one *yellow-e*, one *yellow-e3*, four *yellow-g*, one *yellow-h*,  
862 five *yellow-x*, and one *yellow-y*). Additionally, 13 of these genes (*yellow-e*, *yellow-e3*,  
863 four *yellow-g*, *yellow-h*, *yellow-x*, and five *MJRPs*) were found in tandem array along  
864 three adjacent scaffolds (548, 170, and 36; ~1 Mbp total) on LG 2. This genomic  
865 organization is consistent with a conserved clustering of *yellow-h*, *-e3*, *-e*, *-g2*, and *-g*  
866 observed across *Apis*, *Tribolium*, *Bombyx*, *Drosophila*, and *Nasonia* (Drapeau *et al.* 2006;  
867 Werren *et al.* 2010; Ferguson *et al.* 2011). Like *Nasonia* and *Apis*, this cluster also  
868 contains *MJRPs*; like *Heliconius*, this cluster contains a *yellow-x* gene.

869 The Spot-1 QTL contained 2 *yellow-like* genes that were most similar to *Apis*  
870 *yellow-x1* (e-value:  $1.2 \times 10^{-160}$ ; bitscore: 471.47 and e-value:  $3.9 \times 10^{-151}$ ; bitscore:  
871 448.36). Notably, these genes were located within a scaffold (422) receiving very high  
872 PIP scores (>0.8) in multiple GEMMA analyses. However, there is currently little known  
873 about the function of *yellow-x* genes, which appear to be highly divergent from other  
874 *yellow* gene families (Ferguson *et al.* 2011).

875 The Spot-2 QTL contained the cluster of 13 *yellow* genes described above, along  
876 with two additional *MRJPs* on scaffold 769. Of these, *yellow-e* is the strongest candidate  
877 for larval spotting pattern. In two different mutant strains of *B. mori* (“*bts*” for brown  
878 head and tail spot), mutations in *yellow-e* produced a truncated gene product that results  
879 in increased reddish-brown pigmentation in the head cuticle and anal plate compared to  
880 wildtype strains (Ito *et al.* 2010). Quantitative reverse transcriptase analyses also

881 demonstrated that in wildtype larvae, *yellow-e* is most highly expressed in the integument  
882 of the head and the tail (Ito *et al.* 2010). Based on these observations, one possible  
883 mechanism for the reduced spotting observed in the light-spotted MI population is an  
884 increase in *yellow-e* expression.

885 The Spot-2 QTL also contained a predicted protein that was highly similar to  
886 tyrosine hydroxylase (TH) (e-score:  $6 \times 10^{-123}$ , bitscore: 406). TH catalyzes the  
887 hydroxylation of tyrosine to 3,4-dihydroxyphenylalanine (DOPA), a precursor to  
888 melanin-based pigments (Wright 1987). Work in the swallowtail butterfly *Papilio xuthus*  
889 and the armyworm *Pseudaletia separata* demonstrates that TH and another enzyme, dopa  
890 decarboxylase (DDC), are expressed in larval epithelial cells containing black pigment  
891 (Futahashi and Fujiwara 2005; Ninomiya and Hayakawa 2007). Furthermore, inhibition  
892 of either enzyme prevented the formation of melanin-based larval pigmentation patterns  
893 (Futahashi and Fujiwara 2005). Thus, a reduction in the regional expression of TH is  
894 another plausible mechanism underlying reduced spotting in the light-spotted MI  
895 population.

896 The Spot-1 and Spot-2 QTL also overlap with two minor-effect yellow QTL:  
897 Yellow-2 and Yellow-3 (table, figure). Co-localization of pigmentation and patterning  
898 QTL could be explained either by linkage or pleiotropy. As noted above, spotting and  
899 yellow values are negatively correlated in F<sub>2</sub> males. One explanation for this observation  
900 is that the loci in the Spot-1 and Spot-2 cluster that impact spotting area also impact  
901 overall levels of melanin throughout the integument. With increasing melanin content,  
902 larval color would appear less yellow, leading to a negative correlation between melanin  
903 content and percent yellow.

904 Of our eight candidate QTL regions, Yellow-1 was the only interval for which we  
905 did not find any hits to candidate pigmentation genes (Tables S5 and S7). Outside of  
906 these candidate regions, we found several additional hits in scaffolds that had high-PIP  
907 SNPs. For yellow, we identified a scaffold containing a predicted protein with a high  
908 degree of similarity to carotenoid isomeroxymerase, encoded by *NinaB* in *Drosophila*  
909 (Table S5). Work in *Drosophila* demonstrates that this protein is required for converting  
910 diet-derived carotenoids into visual pigments (Voolstra *et al.* 2010). For spotting, we  
911 found several additional candidate genes involved or potentially involved in melanin  
912 patterning, including *AbdB*, which encodes an Abdominal-B HOX protein that has been  
913 implicated in *Drosophila* pigmentation (Jeong *et al.* 2006), and several cytochrome  
914 p450s, one of which has been implicated in insect cuticle formation (Sztal *et al.* 2012)  
915 (Table S6).

916 Although all of our candidates require further fine-mapping and functional  
917 testing, we are encouraged to have identified multiple strong candidates for both traits.  
918 Notably, we report the first candidate genes for naturally occurring variation in  
919 carotenoid-based pigmentation in invertebrates. Additionally, some of our most  
920 promising candidate genes (*Cameo2*, *apoLTP-II/I*, *yellow-e*, and *ple*) fell just outside of  
921 the 1.5-LOD support intervals, but were included in the expanded candidate region on the  
922 basis of GEMMA and ALLMAPS results (Tables S5-S6). Should these candidates hold  
923 up to further experimental scrutiny, our findings suggest that combining QTL mapping  
924 and polygenic association mapping may be a fruitful approach for defining candidate  
925 regions.

926

927

928

## 929 **Summary and Conclusions**

930

931 In this study, we applied a combination of interval mapping and polygenic  
932 association mapping to describe the genetic architecture of two larval color traits: yellow  
933 pigmentation and spotting pattern. Both sets of analyses detect large-effect loci for both  
934 traits. Although we cannot yet rule out linked mutations of individually smaller effect, we  
935 discuss details of the demographic histories of these populations that may have favored  
936 the fixation of large-effect color alleles. Additionally, genetic architecture parameter  
937 estimates derived under the BSLMM implemented in GEMMA suggest that compared to  
938 the effect-size distribution underlying variation in spotting, the effect-size distribution for  
939 yellow is shifted towards alleles of larger effect. These findings are consistent with the  
940 pigmentation/patterning hypothesis, which argues that the genetic architecture of  
941 pigmentation should be “simpler” than that of patterning because pigmentation genes  
942 tend to be less pleiotropic than patterning genes. Verifying this hypothesis will require  
943 identifying quantitative trait nucleotides (QTNs) and assessing additional populations and  
944 species.

944

945 In addition to contrasting the genetic architecture of two color traits, we also  
946 identified several promising candidate genes that may contribute to natural variation in  
947 larval color. Although there are a growing number of studies of naturally occurring  
948 melanin-based pigmentation in adult insects (*e.g.*, Hof *et al.* 2016; Nadeau *et al.* 2016;  
949 Signor *et al.* 2016; Yassin *et al.* 2016), studies of naturally occurring larval color  
950 variation are sparse. Additionally, although carotenoids contribute to adaptive  
951 pigmentation in diverse animal taxa (Heath *et al.* 2013; Toews *et al.* 2017), ours is the  
952 first genetic study of naturally occurring variation in carotenoid-based pigmentation in a  
953 non-vertebrate. Thus, extensive intra- and interspecific variation in larval body color  
954 across the genus *Neodiprion* (Fig. 1) has the potential to provide novel insights into the  
955 molecular mechanisms underlying carotenoid-based pigmentation.

955

956 Finally, our study demonstrates the power of combining traditional interval  
957 mapping approaches with polygenic association mapping. Our combined approach not  
958 only enabled us to identify a surprisingly large number of promising candidate genes  
959 residing both within and outside of linkage-mapping-identified QTL, but also provided an  
960 intuitive way to describe and compare trait genetic architectures. We believe that this  
961 approach will prove valuable for testing additional theoretical predictions regarding trait  
962 genetic architectures. Ultimately, such studies will provide us with a more comprehensive  
963 understanding of the contribution of large-effect mutations to phenotypic evolution under  
964 different evolutionary scenarios.

964

965

## 965 **ACKNOWLEDGEMENTS**

966

967 For assistance with collecting and maintaining sawfly colonies, we thank past members  
968 of the Linnen laboratory, especially Robin Bagley, Adam Leonberger, Kim Vertacnik,  
969 Mary Collins, and Aubrey Mojesky. For assistance with phenotypic data collection, we  
970 thank Aubrey Mojesky, Mary Collins, and Ismaeel Siddiqi. For advice on linkage  
971 mapping in R/qtl, we thank Karl Broman and Kelly O’Quin. For helpful comments on the  
972 manuscript, we thank Danielle Herrig, Emily Bendall, and Kim Vertacnik. Funding for

973 this research was provided by the National Science Foundation (DEB-1257739; CRL),  
974 the United States Department of Agriculture National Institute of Food and Agriculture  
975 (2016-67014-2475; CRL), the Academy of Finland (project no. 257581; CL), and the  
976 University of Kentucky (Ribble summer undergraduate research fellowship, honors  
977 program independent research grant, and summer research and creativity fellowship to  
978 TS).

979

980

## REFERENCES

981

- 982 Altschul S. F., Gish W., Miller W., Myers E. W., Lipman D. J., 1990 Basic Local  
983 Alignment Search Tool. *J. Mol. Biol.*: 403–410.
- 984 Amézquita A., Ramos Ó., González M. C., Rodriguez C., Medina I., Simões P. I., Lima  
985 A. P., 2017 Conspicuousness, color resemblance, and toxicity in geographically  
986 diverging mimicry: The pan-Amazonian frog *Allobates femoralis*. *Evolution* 71:  
987 1039–1050.
- 988 Bagley R. K., Sousa V. C., Niemiller M. L., Linnen C. R., 2017 History, geography and  
989 host use shape genomewide patterns of genetic variation in the redheaded pine  
990 sawfly (*Neodiprion lecontei*). *Mol. Ecol.* 26: 1022–1044.
- 991 Bateson W., 1913 *Mendel's Principles of Heredity*. Cambridge University Press,  
992 Cambridge.
- 993 Baxter S. W., Johnston S. E., Jiggins C. D., 2009 Butterfly speciation and the distribution  
994 of gene effect sizes fixed during adaptation. *Heredity* 102: 57–65.
- 995 Bendall E. E., Vertacnik K. L., Linnen C. R., 2017 Oviposition traits generate extrinsic  
996 postzygotic isolation between two pine sawfly species. *BMC Evol. Biol.* 17: 26.
- 997 Benjamin D. M., 1955 The biology and ecology of the red-headed pine sawfly. USDA  
998 Tech. Bull. 118: 55p.
- 999 Bhosale P., Bernstein P. S., 2007 Vertebrate and invertebrate carotenoid-binding proteins.  
1000 *Arch. Biochem. Biophys.* 458: 121–127.
- 1001 Bickel R. D., Kopp A., Nuzhdin S. V., 2011 Composite effects of polymorphisms near  
1002 multiple regulatory elements create a major-effect QTL. *PLoS Genet.* 7: e1001275.
- 1003 Broman K. W., Sen S., 2009 *A Guide to QTL Mapping with R/qtl*. Springer, New York.
- 1004 Catchen J., Hohenlohe P. A., Bassham S., Amores A., Cresko W. A., 2013 Stacks: An  
1005 analysis tool set for population genomics. *Mol. Ecol.* 22: 3124–3140.
- 1006 Chen H., Rangasamy M., Tan S. Y., Wang H., Siegfried B. D., 2010 Evaluation of five  
1007 methods for total DNA extraction from western corn rootworm beetles. *PLoS One* 5.
- 1008 Codella S. G., Raffa K. F., 1993 Defense strategies of folivorous sawflies. In: Wagner M,  
1009 Raffa KF (Eds.), *Sawfly Life History Adaptations to Woody Plants*. Academic Press  
1010 Inc., San Diego, pp. 261–294.
- 1011 Codella S. G., Raffa K. F., 1995 Host plant influence on chemical defense in conifer  
1012 sawflies (Hymenoptera: Diprionidae). *Oecologia* 104: 1–11.
- 1013 Coppel H. C., Benjamin D. M., 1965 Bionomics of Nearctic pine-feeding diprionids.  
1014 *Annu. Rev. Entomol.* 10: 69–96.
- 1015 Crozier R. H., Fjerdingstad E. J., 2001 Polyandry in social Hymenoptera: disunity in  
1016 diversity? *Ann. Zool. Fennici* 38: 267–285.
- 1017 Danecek P., Auton A., Abecasis G., Albers C. A., Banks E., *et al.*, 2011 The variant call  
1018 format and VCFtools. *Bioinformatics* 27: 2156–2158.

- 1019 Darwin C., 1859 *On the Origin of Species by Means of Natural Selection, or the*  
1020 *Preservation of Favoured Races in the Struggle for Life*. John Murray, London.
- 1021 Davey J. W., Hohenlohe P. A., Etter P. D., Boone J. Q., Catchen J. M., *et al.*, 2011  
1022 Genome-wide genetic marker discovery and genotyping using next-generation  
1023 sequencing. *Nat. Rev. Genet.* 12: 499–510.
- 1024 Dittmar E. L., Oakley C. G., Conner J. K., Gould B., Schemske D., 2016 Factors  
1025 influencing the effect size distribution of adaptive substitutions. *Proc. R. Soc. B* 283:  
1026 20153065.
- 1027 Drapeau M. D., Albert S., Kucharski R., Prusko C., Maleszka R., 2006 Evolution of the  
1028 Yellow/Major Royal Jelly Protein family and the emergence of social behavior in  
1029 honey bees. *Genome Res.*: 1385–1394.
- 1030 Eisner T., Johnnesse Js, Carrel J., Hendry L. B., Meinwald J., 1974 Defensive use by an  
1031 insect of a plant resin. *Science* 184: 996–999.
- 1032 Elsik C. G., Tayal A., Diesh C. M., Unni D. R., Emery M. L., *et al.*, 2016 Hymenoptera  
1033 Genome Database: Integrating genome annotations in HymenopteraMine. *Nucleic*  
1034 *Acids Res.* 44: D793–D800.
- 1035 Ferguson L. C., Green J., SurrIDGE A., Jiggins C. D., 2011 Evolution of the insect yellow  
1036 gene family. *Mol. Biol. Evol.* 28: 257–272.
- 1037 Fisher R. A., 1930 *The Genetical Theory of Natural Selection*. Oxford University Press,  
1038 Oxford.
- 1039 Frankel N., Ereyilmaz D. F., McGregor A. P., Wang S., Payre F., *et al.*, 2011  
1040 Morphological evolution caused by many subtle-effect substitutions in regulatory  
1041 DNA. *Nature* 474: 598–603.
- 1042 Futahashi R., Fujiwara H., 2005 Melanin-synthesis enzymes coregulate stage-specific  
1043 larval cuticular markings in the swallowtail butterfly, *Papilio xuthus*. *Dev. Genes*  
1044 *Evol.* 215: 519–529.
- 1045 Gadau J., Page R. E., Werren J. H., Schmid-Hempel P., 2000 Genome organization and  
1046 social evolution in Hymenoptera. *Naturwissenschaften* 87: 87–9.
- 1047 Gaj T., Gersbach C. A., Barbas C. F., 2013 ZFN, TALEN, and CRISPR/Cas-based  
1048 methods for genome engineering. *Trends Biotechnol.* 31: 397–405.
- 1049 Glastad K. M., Arsenault S. V., Vertacnik K. L., Geib S. M., Kay S., *et al.*, 2017  
1050 Variation in DNA methylation is not consistently reflected by sociality in  
1051 Hymenoptera. *Genome Biol. Evol.* 9: 1687–1698.
- 1052 Goldschmidt R., 1940 *The Material Basis of Evolution*. Yale University Press, New  
1053 Haven.
- 1054 Goodwin S., Mcpherson J. D., McCombie W. R., 2016 Coming of age: ten years of next-  
1055 generation sequencing technologies. *Nat. Rev. Genet.* 17: 333–351.
- 1056 Griswold C. K., 2006 Gene flow's effect on the genetic architecture of a local adaptation  
1057 and its consequences for QTL analyses. *Heredity* 96: 445–453.
- 1058 Han Q., Fang J., Ding H., Johnson J. K., Christensen B. M., *et al.*, 2002 Identification of  
1059 *Drosophila melanogaster* yellow-f and yellow-f2 proteins as dopachrome-  
1060 conversion enzymes. *Biochem. J.* 368: 333–40.
- 1061 Harper K. E., Bagley R. K., Thompson K. L., Linnen C. R., 2016 Complementary sex  
1062 determination, inbreeding depression and inbreeding avoidance in a gregarious  
1063 sawfly. *Heredity* 117: 326–335.
- 1064 Heath J. J., Cipollini D. F., Stireman J. O., 2013 The role of carotenoids and their



- 1065 derivatives in mediating interactions between insects and their environment.  
1066 Arthropod. Plant. Interact. 7: 1–20.
- 1067 Heimpel G. E., Boer J. G. de, 2008 Sex determination in the Hymenoptera. Annu. Rev.  
1068 Entomol. 53: 209–30.
- 1069 Hermisson J., Pennings P. S., 2005 Soft sweeps: molecular population genetics of  
1070 adaptation from standing genetic variation. Genetics 169: 2335–2352.
- 1071 Hof A. E. van't, Campagne P., Rigden D. J., Yung C. J., Lingley J., *et al.*, 2016 The  
1072 industrial melanism mutation in British peppered moths is a transposable element.  
1073 Nature 534: 102–105.
- 1074 Hoggart C. J., Whittaker J. C., Iorio M. De, Balding D. J., 2008 Simultaneous analysis of  
1075 all SNPs in genome-wide and re-sequencing association studies. PLoS Genet. 4:  
1076 e1000130.
- 1077 Huang A., Xu S., Cai X., 2015 Empirical Bayesian elastic net for multiple quantitative  
1078 trait locus mapping. Heredity 114: 107–15.
- 1079 Huang Y., Liu Z., Rong Y. S., 2016 Genome editing: From *Drosophila* to non-model  
1080 insects and beyond. J. Genet. Genomics 43: 263–272.
- 1081 Huxley T. H., 1860 On species, races and their origin. J. Proc. R. Inst. Gt. Britain 1858-  
1082 1862 3: 151-153.
- 1083 Ito K., Katsuma S., Yamamoto K., Kadono-Okuda K., Mita K., *et al.*, 2010 Yellow-e  
1084 determines the color pattern of larval head and tail spots of the silkworm *Bombyx*  
1085 *mori*. J. Biol. Chem. 285: 5624–5629.
- 1086 Jeong S., Rokas A., Carroll S. B., 2006 Regulation of body pigmentation by the  
1087 Abdominal-B Hox protein and its gain and loss in *Drosophila* evolution. Cell 125:  
1088 1387–1399.
- 1089 Joron M., Mallet J. L. B., 1998 Diversity in mimicry: Paradox or paradigm? Trends Ecol.  
1090 Evol. 13: 461–466.
- 1091 Kapan D. D., 2001 Three-butterfly system provides field test of Mullerian mimicry.  
1092 Nature 409: 338–340.
- 1093 Kimura M., 1983 *The Neutral Theory of Molecular Evolution*. Cambridge University  
1094 Press, Cambridge, UK.
- 1095 Knerer G., Atwood C. E., 1972 Evolutionary trends in subsocial sawflies belonging to  
1096 *Neodiprion abietis* complex (Hymenoptera: Tenthredinoidea). Am. Zool. 12: 407–  
1097 418.
- 1098 Knerer G., Atwood C. E., 1973 Diprionid sawflies: polymorphism and speciation.  
1099 Science 179: 1090–1099.
- 1100 Kopp A., 2009 Metamodels and phylogenetic replication: a systematic approach to the  
1101 evolution of developmental pathways. Evolution 63: 2771–2789.
- 1102 Kraemer M. E., Coppel H. C., 1983 Hybridization of jack pine feeding sawflies  
1103 (Diprionidae: *Neodiprion*). Forestry Research Notes. University of Wisconsin,  
1104 Madison, WI.
- 1105 Kronforst M. R., Gilbert L. E., 2008 The population genetics of mimetic diversity in  
1106 *Heliconius* butterflies. Proc. Biol. Sci. 275: 493–500.
- 1107 Kronforst M. R., Barsh G. S., Kopp A., Mallet J., Monteiro A., *et al.*, 2012 Unraveling  
1108 the thread of nature's tapestry: The genetics of diversity and convergence in animal  
1109 pigmentation. Pigment Cell Melanoma Res. 25: 411–433.
- 1110 Lee E., Helt G. A., Reese J. T., Munoz-Torres M. C., Childers C. P., *et al.*, 2013 Web

- 1111 Apollo: a web-based genomic annotation editing platform. *Genome Biol.* 14: R93.  
1112 Li H., Handsaker B., Wysoker A., Fennell T., Ruan J., *et al.*, 2009 The Sequence  
1113 Alignment/Map format and SAMtools. *Bioinformatics* 25: 2078–2079.  
1114 Li Z., Guo B., Yang J., Herczeg G., Gonda A., *et al.*, 2017 Deciphering the genomic  
1115 architecture of the stickleback brain with a novel multilocus gene-mapping  
1116 approach. *Mol. Ecol.* 26: 1557–1575.  
1117 Lindstedt C., Carita L., Mappes J., Johanna M., Päävinen J., *et al.*, 2006 Effects of group  
1118 size and pine defence chemicals on Diprionid sawfly survival against ant predation.  
1119 *Oecologia* 150: 519–26.  
1120 Lindstedt C., Lindstrom L., Mappes J., 2009 Thermoregulation constrains effective  
1121 warning signal expression. *Evolution* 63: 469–478.  
1122 Lindstedt C., Huttunen H., Kakko M., Mappes J., 2011 Disentangling the evolution of  
1123 weak warning signals: High detection risk and low production costs of chemical  
1124 defences in gregarious pine sawfly larvae. *Evol. Ecol.* 25: 1029–1046.  
1125 Lindstedt C., Schroderus E., Lindström L., Mappes T., Mappes J., 2016 Evolutionary  
1126 constraints of warning signals: A genetic trade-off between the efficacy of larval and  
1127 adult warning coloration can maintain variation in signal expression. *Evolution* 70:  
1128 2562–2572.  
1129 Linnen C. R., Farrell B. D., 2007 Mitonuclear discordance is caused by rampant  
1130 mitochondrial introgression in *Neodiprion* (Hymenoptera: Diprionidae) sawflies.  
1131 *Evolution* 61: 1417–1438.  
1132 Linnen C. R., Farrell B. D., 2008a Phylogenetic analysis of nuclear and mitochondrial  
1133 genes reveals evolutionary relationships and mitochondrial introgression in the  
1134 sertifer species group of the genus *Neodiprion* (Hymenoptera: Diprionidae). *Mol.*  
1135 *Phylogenet. Evol.* 48: 240–257.  
1136 Linnen C. R., Farrell B. D., 2008b Comparison of methods for species-tree inference in  
1137 the sawfly genus *Neodiprion* (Hymenoptera: Diprionidae). *Syst. Biol.* 57: 876–90.  
1138 Linnen C. R., Poh Y.-P., Peterson B. K., Barrett R. D. H., Larson J. G., *et al.*, 2013  
1139 Adaptive evolution of multiple traits through multiple mutations at a single gene.  
1140 *Science* 339: 1312–6.  
1141 Lopes R. J., Johnson J. D., Toomey M. B., Ferreira M. S., Araujo P. M., *et al.*, 2016  
1142 Genetic basis for red coloration in birds. *Curr. Biol.* 26: 1427–1434.  
1143 Mackay T. F. C., Stone E. A., Ayroles J. F., 2009 The genetics of quantitative traits:  
1144 challenges and prospects. *Nat. Rev. Genet.* 10: 565–577.  
1145 Mallet J., Singer M. C., 1987 Individual selection, kin selection, and the shifting balance  
1146 in the evolution of warning colours: the evidence from butterflies. *Biol. J. Linn. Soc.*  
1147 32: 337–350.  
1148 Manceau M., Domingues V. S., Linnen C. R., Rosenblum E. B., Hoekstra H. E., 2010  
1149 Convergence in pigmentation at multiple levels: mutations, genes and function.  
1150 *Philos. Trans. R. Soc. Lond. B. Biol. Sci.* 365: 2439–2450.  
1151 Martin A., Orgogozo V., 2013 The loci of repeated evolution: A catalog of genetic  
1152 hotspots of phenotypic variation. *Evolution* 67: 1235–1250.  
1153 Martin C. H., Erickson P. A., Miller C. T., 2017 The genetic architecture of novel trophic  
1154 specialists: larger effect sizes are associated with exceptional oral jaw diversification  
1155 in a pupfish adaptive radiation. *Mol. Ecol.* 26: 624–638.  
1156 Matuszewski S., Hermisson J., Kopp M., 2014 Fisher’s geometric model with a moving

- 1157 optimum. *Evolution* 68: 2571–2588.
- 1158 Matuszewski S., Hermisson J., Kopp M., 2015 Catch me if you can: Adaptation from  
1159 standing genetic variation to a moving phenotypic optimum. *Genetics* 200: 1255–  
1160 1274.
- 1161 Maxwell D. E., 1958 Sawfly-cytology with emphasis upon Diprionidae (Hymenoptera,  
1162 Symphyta). *Proc 10th Int Congr Entomol.* 2: 961–978.
- 1163 Mayr E., 1982 *The Growth of Biological Thought: Diversity, Evolution, and Inheritance.*  
1164 Harvard University Press, Cambridge.
- 1165 McGirr J. A., Martin C. H., Agashe D., 2017 Novel candidate genes underlying extreme  
1166 trophic specialization in caribbean pupfishes. *Mol. Biol. Evol.* 34: 873–888.
- 1167 McGraw K. J., Hudon J., Hill G. E., Parker R. S., 2005 A simple and inexpensive  
1168 chemical test for behavioral ecologists to determine the presence of carotenoid  
1169 pigments in animal tissues. *Behav. Ecol. Sociobiol.* 57: 391–397.
- 1170 McGregor A. P., Orgogozo V., Delon I., Zanet J., Srinivasan D. G., *et al.*, 2007  
1171 Morphological evolution through multiple cis-regulatory mutations at a single gene.  
1172 *Nature* 448: 587–590.
- 1173 Morgan T. H., 1932 *The Scientific Basis of Evolution.* Norton, New York.
- 1174 Mundy N. I. I., Stapley J., Bennison C., Tucker R., Twyman H., *et al.*, 2016 Red  
1175 carotenoid coloration in the zebra finch is controlled by a cytochrome P450 gene  
1176 cluster. *Curr. Biol.* 26: 1435–1440.
- 1177 Nadeau N. J., Jiggins C. D., 2010 A golden age for evolutionary genetics? Genomic  
1178 studies of adaptation in natural populations. *Trends Genet.* 26: 484–492.
- 1179 Nadeau N. J., Pardo-Diaz C., Whibley A., Supple M. A., Saenko S. V., *et al.*, 2016 The  
1180 gene *cortex* controls mimicry and crypsis in butterflies and moths. *Nature* 534: 106–  
1181 110.
- 1182 Ninomiya Y., Hayakawa Y., 2007 Insect cytokine, growth-blocking peptide, is a primary  
1183 regulator of melanin-synthesis enzymes in armyworm larval cuticle. *FEBS J.* 274:  
1184 1768–1777.
- 1185 Nokelainen O., Valkoen J., Lindstedt C., Mappes J., 2014 Changes in predator  
1186 community structure shifts the efficacy of two warning signals in Arctiid moths. *J.*  
1187 *Anim. Ecol.* 83: 598-605.
- 1188 O’Quin C. T., Drilea A. C., Conte M. A., Kocher T. D., 2013 Mapping of pigmentation  
1189 QTL on an anchored genome assembly of the cichlid fish, *Metriaclima zebra*. *BMC*  
1190 *Genomics* 14: 287.
- 1191 Orr H. A., Coyne J. A., 1992 The genetics of adaptation: a reassessment. *Am. Nat.* 140:  
1192 725–742.
- 1193 Orr H. A., 1998 The population genetics of adaptation: the distribution of factors fixed  
1194 during adaptive evolution. *Evolution* 52: 935–949.
- 1195 Orr H. A., 2005 The genetic theory of adaptation: a brief history. *Nat. Rev. Genet.* 6:  
1196 119–127.
- 1197 Otto S. P., Jones C. D., 2000 Detecting the undetected: estimating the total number of  
1198 loci underlying a quantitative trait. *Genetics* 156: 2093–2107.
- 1199 Palm W., Sampaio J. L., Brankatschk M., Carvalho M., Mahmoud A., *et al.*, 2012  
1200 Lipoproteins in *Drosophila melanogaster*: assembly, function, and influence on  
1201 tissue lipid composition. *PLoS Genet.* 8.
- 1202 Pearson K., 1897 Mathematical contributions to the theory of evolution. On the law of

- 1203 ancestral heredity. *Proc. R. Soc. London* 62: 386–412.
- 1204 Peterson B. K., Weber J. N., Kay E. H., Fisher H. S., Hoekstra H. E., 2012 Double digest  
1205 RADseq: an inexpensive method for de novo SNP discovery and genotyping in  
1206 model and non-model species. *PLoS One* 7: e37135.
- 1207 Poelchau M., Childers C., Moore G., Tsavatapalli V., Evans J., *et al.*, 2014 The i5k  
1208 Workspace@NAL: enabling genomic data access, visualization and curation of  
1209 arthropod genomes. *Nucleic Acids Res.* 43: D714–D719.
- 1210 Protas M. E., Patel N. H., 2008 Evolution of coloration patterns. *Annu. Rev. Cell Dev.*  
1211 *Biol.* 24: 425–446.
- 1212 Prud'homme B., Gompel N., Rokas A., Kassner V. A., Williams T. M., *et al.*, 2006  
1213 Repeated morphological evolution through cis-regulatory changes in a pleiotropic  
1214 gene. *Nature* 440: 1050–1053.
- 1215 Purcell S., Neale B., Todd-Brown K., Thomas L., Ferreira M. A. R., *et al.*, 2007 PLINK:  
1216 A tool set for whole-genome association and population-based linkage analyses. 81:  
1217 559–575.
- 1218 Rebeiz M., Pool J. E., Kassner V. A., Aquadro C. F., Carroll S. B., 2009 Stepwise  
1219 modification of a modular enhancer underlies adaptation in a *Drosophila* population.  
1220 *Science* 326: 1663–1667.
- 1221 Remington D. L., 2015 Alleles versus mutations: Understanding the evolution of genetic  
1222 architecture requires a molecular perspective on allelic origins. *Evolution* 69: 3025–  
1223 3038.
- 1224 Rieseberg L. H., Archer M. A., Wayne R. K., 1999 Transgressive segregation, adaptation  
1225 and speciation. *Heredity* 83: 363–372.
- 1226 Rockman M. V., 2012 The QTN program and the alleles that matter for evolution: All  
1227 that's gold does not glitter. *Evolution* 66: 1–17.
- 1228 Rogers S. M., Tamkee P., Summers B., Balabhadra S., Marks M., *et al.*, 2012 Genetic  
1229 signature of adaptive peak shift in threespine stickleback. *Evolution* 66: 2439–2450.
- 1230 Roshyara N. R., Scholz M., 2014 fcGENE: A versatile tool for processing and  
1231 transforming SNP datasets. *PLoS One* 9.
- 1232 Ruxton G. D., Sherratt T. N., Speed M. P., 2004 *Avoiding Attack: The Evolutionary*  
1233 *Ecology of Crypsis, Warning Signals and Mimicry*. Oxford University Press, New  
1234 York.
- 1235 Sakudoh T., Iizuka T., Narukawa J., Sezutsu H., Kobayashi I., *et al.*, 2010 A CD36-  
1236 related transmembrane protein is coordinated with an intracellular lipid-binding  
1237 protein in selective carotenoid transport for cocoon coloration. *J. Biol. Chem.* 285:  
1238 7739–7751.
- 1239 Scheet P., Stephens M., 2006 A fast and flexible statistical model for large-scale  
1240 population genotype data: applications to inferring missing genotypes and  
1241 haplotypic phase. *Am. J. Hum. Genet.* 78: 629–44.
- 1242 Schmid-Hempel P., 2000 Mating, parasites and other trials of life in social insects.  
1243 *Microbes Infect.* 2: 515–520.
- 1244 Signor S. A., Liu Y., Rebeiz M., Kopp A., 2016 Genetic convergence in the evolution of  
1245 male-specific color patterns in *Drosophila*. *Curr. Biol.* 26: 2423–2433.
- 1246 Skinner M. E., Uzilov A. V., Stein L. D., Mungall C. J., Holmes I. H., 2009 JBrowse: a  
1247 next-generation genome browser. *Genome Res* 19: 1630–1638.
- 1248 Smith S. G., 1941 A new form of spruce sawfly identified by means of its cytology and

- 1249 parthenogenesis. *Sci. Agric.* 21: 245–305.
- 1250 Sohi S. S., Ennis T. J., 1981 Chromosomal characterization of cell lines of *Neodiprion*  
1251 *lecontei* (Hymenoptera: Diprionidae). *Proc. Entomol. Soc. Ontario* 112: 45–48.
- 1252 Stam L. F., Laurie C. C., 1996 Molecular dissection of a major gene effect on a  
1253 quantitative trait: the level of alcohol dehydrogenase expression in *Drosophila*  
1254 *melanogaster*. *Evolution* 50: 1559–1564.
- 1255 Sugumaran M., Berek H., 2016 Critical analysis of the melanogenic pathway in insects  
1256 and higher animals. *Int. J. Mol. Sci.* 17: 1–24.
- 1257 Sztal T., Chung H., Berger S., Currie P. D., Batterham P., *et al.*, 2012 A cytochrome  
1258 P450 conserved in insects is involved in cuticle formation. *PLoS One* 7: 1–9.
- 1259 Tang H., Zhang X., Miao C., Zhang J., Ming R., *et al.*, 2015 ALLMAPS: robust scaffold  
1260 ordering based on multiple maps. *Genome Biol.* 16: 3.
- 1261 Taylor J., Butler D., 2017 R Package ASMap: Efficient genetic linkage map construction  
1262 and diagnosis. *J. Stat. Softw.* 79: 1–29.
- 1263 R Core Team, 2013 R: A language and environment for statistical computing.
- 1264 Toews D. P. L., Hofmeister N. R., Taylor S. A., 2017 The evolution and genetics of  
1265 carotenoid processing in animals. *Trends Genet.* 33: 171–182.
- 1266 True J. R., 2003 Insect melanism: The molecules matter. *Trends Ecol. Evol.* 18: 640–647.
- 1267 Tsuchida K., Arai M., Tanaka Y., Ishihara R., Ryan R. O., *et al.*, 1998 Lipid transfer  
1268 particle catalyzes transfer of carotenoids between lipophorins of *Bombyx mori*.  
1269 *Insect Biochem. Mol. Biol.* 28: 927–934.
- 1270 Tsuchida K., Sakudoh T., 2015 Recent progress in molecular genetic studies on the  
1271 carotenoid transport system using cocoon-color mutants of the silkworm. *Arch.*  
1272 *Biochem. Biophys.* 572: 151–157.
- 1273 Turner J. R. G., Mallet J. L. B., 1996 Did forest islands drive the diversity of warningly  
1274 coloured butterflies? Biotic drift and the shifting balance. *Philos. Trans. R. Soc. B*  
1275 *Biol. Sci.* 351: 835–845.
- 1276 Turner S. D., 2014 qqman: an R package for visualizing GWAS results using QQ and  
1277 manhattan plots. *BioRxiv*: 5165.
- 1278 Vertacnik K. L., Geib S., Linnen C. R., 2016 *Neodiprion lecontei* genome assembly  
1279 Nlec1.0. NCBI/GenBank. <http://dx.doi.org/10.15482/USDA.ADC/1235565>.
- 1280 Woolstra O., Oberhauser V., Sumser E., Meyer N. E., Maguire M. E., *et al.*, 2010 NinaB  
1281 is essential for *Drosophila* vision but induces retinal degeneration in opsin-deficient  
1282 photoreceptors. *J. Biol. Chem.* 285: 2130–2139.
- 1283 Werren J. H., Richards S., Desjardins C. A., Niehuis O., Gadau J., *et al.*, 2010 Functional  
1284 and evolutionary insights from the genomes of three parasitoid *Nasonia* species.  
1285 *Science* 327: 343–348.
- 1286 Wilfert L., Gadau J., Schmid-Hempel P., 2007 Variation in genomic recombination rates  
1287 among animal taxa and the case of social insects. *Heredity* 98: 189–197.
- 1288 Willmott K. R., Willmott J. C. R., Elias M., Jiggins C. D., 2017 Maintaining mimicry  
1289 diversity: optimal warning colour patterns differ among microhabitats in Amazonian  
1290 clearwing butterflies. *Proc. R. Soc. B* 284: 20170744.
- 1291 Wilson L. F., Wilkinson R. C., Averill R. C., 1992 *Redheaded Pine Sawfly: Its Ecology*  
1292 *and Management*. USDA, Washington DC.
- 1293 Wittkopp P. J., Vaccaro K., Carroll S. B., 2002 Evolution of *yellow* gene regulation and  
1294 pigmentation in *Drosophila*. *Curr. Biol.* 12: 1547–1556.

- 1295 Wittkopp P. J., Carroll S. B., Kopp A., 2003 Evolution in black and white: Genetic  
1296 control of pigment patterns in *Drosophila*. Trends Genet. 19: 495–504.
- 1297 Wittkopp P. J., Beldade P., 2009 Development and evolution of insect pigmentation:  
1298 Genetic mechanisms and the potential consequences of pleiotropy. Semin. Cell Dev.  
1299 Biol. 20: 65–71.
- 1300 Wright T. R. F., 1987 The genetics of biogenic amine metabolism, sclerotization, and  
1301 melanization in *Drosophila melanogaster*. Adv. Genet. 24: 127–222.
- 1302 Yassin A., Delaney E. K., Reddiex A. J., Seher T. D., Bastide H., *et al.*, 2016 The *pdm3*  
1303 locus is a hotspot for recurrent evolution of female-limited color dimorphism in  
1304 *Drosophila*. Curr. Biol. 26: 2412–2422.
- 1305 Yeaman S., Whitlock M. C., 2011 The genetic architecture of adaptation under  
1306 migration-selection balance. Evolution 65: 1897–1911.
- 1307 Yi N., Banerjee S., 2009 Hierarchical generalized linear models for multiple quantitative  
1308 trait locus mapping. Genetics 181: 1101–1113.
- 1309 Yokoyama H., Yokoyama T., Yuasa M., Fujimoto H., Sakudoh T., *et al.*, 2013 Lipid  
1310 transfer particle from the silkworm, *Bombyx mori*, is a novel member of the  
1311 apoB/large lipid transfer protein family. J. Lipid Res. 54: 2379–90.
- 1312 Zhou X., Carbonetto P., Stephens M., 2013 Polygenic Modeling with Bayesian Sparse  
1313 Linear Mixed Models. PLoS Genet. 9.
- 1314
- 1315

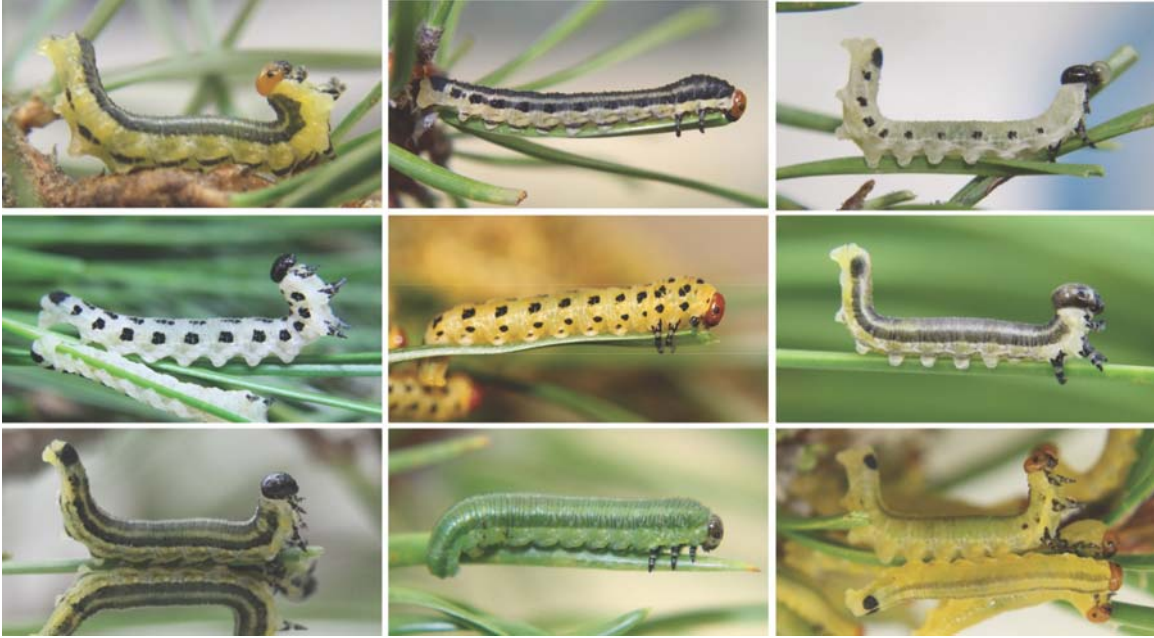

1316  
1317  
1318  
1319  
1320  
1321  
1322  
1323  
1324  
1325

**Figure 1. Interspecific variation in *Neodiprion* larval color.** Top row (left to right):  
*Neodiprion nigroscutum*, *N. rugifrons*, *N. virginianus*. Middle row (left to right): *N.*  
*pinetum*, *N. lecontei*, *N. merkeli*. Bottom row (left to right): *N. pratti*, *N. compar*, *N.*  
*swainei*. Larvae in the first and last columns are exhibiting a defensive “U-bend” posture  
(a resinous regurgitant is visible in *N. virginianus*, top right). *N. pratti* photo is by K.  
Vertacnik, all others are by R. Bagley.

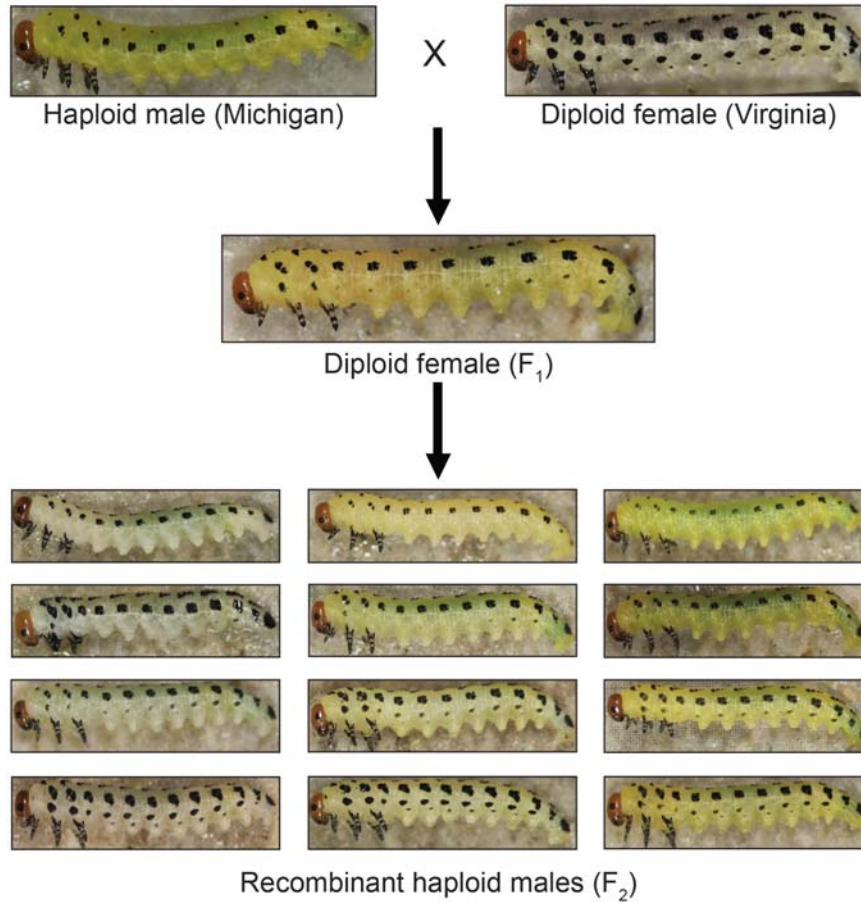

1326  
1327  
1328  
1329  
1330  
1331  
1332  
1333  
1334

**Figure 2. Intraspecific variation in *Neodiprion lecontei* larval color and cross design.**

We crossed white, dark-spotted diploid females from Virginia to yellow, light-spotted haploid males from Michigan. This produced haploid males with the VA genotype and phenotype (not shown) and diploid females (F<sub>1</sub>) with intermediate spotting and color. Virgin F<sub>1</sub> females produced recombinant haploid males (F<sub>2</sub>) with a wide range of body color and spotting pattern (a representative sample is shown).



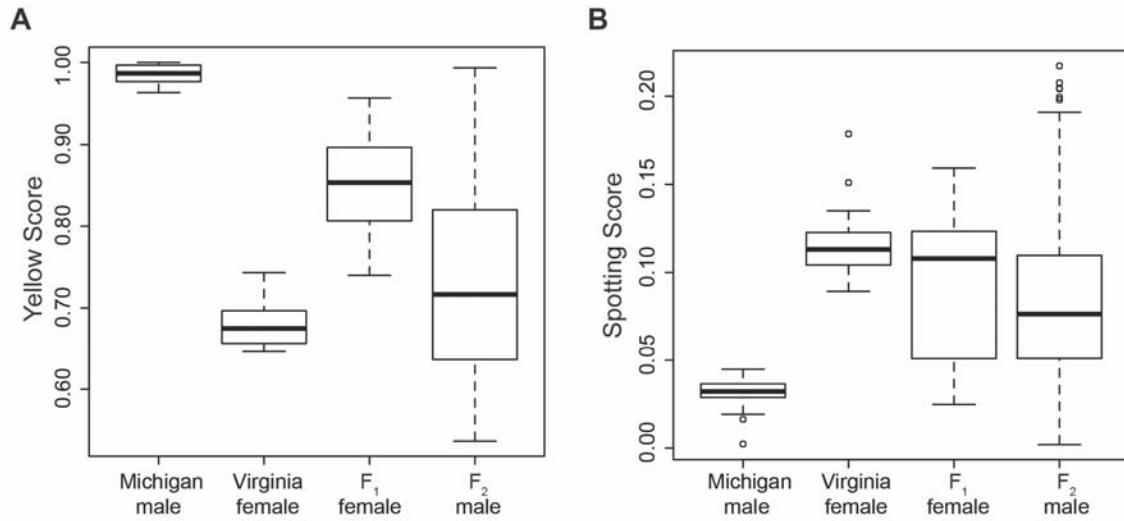

1335  
1336  
1337  
1338  
1339  
1340  
1341  
1342  
1343  
1344

**Figure 3. Larval color variation across generations.** Variation in larval body color (A; higher yellow scores indicate more yellow pigment) and spotting pattern (B; higher spotting scores indicate more melanic spotting), both measured from digital images as described in the text. Boxes represent interquartile ranges (median  $\pm$  2 s.d.), with outliers indicated as points. All comparisons were significantly different after correction for multiple testing (adjusted  $\alpha = 0.0042$ ) except F<sub>1</sub> female vs. F<sub>2</sub> male spotting score (see text).

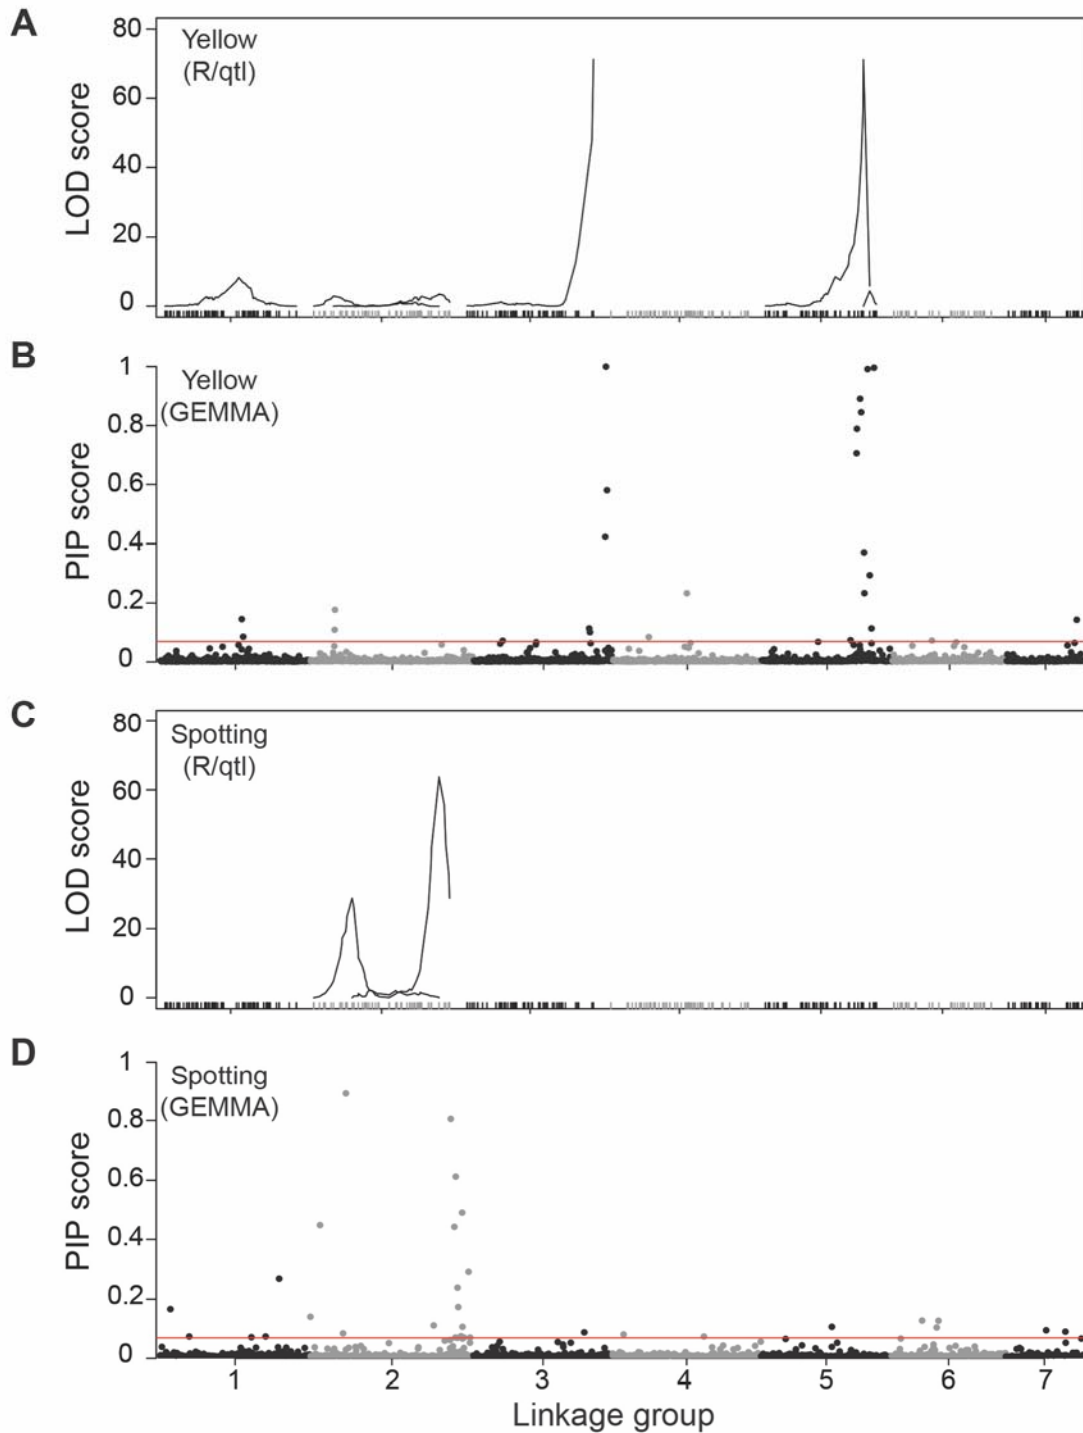

1345  
1346  
1347  
1348  
1349  
1350  
1351  
1352

**Figure 4. Linkage mapping and polygenic association mapping results.** Linkage mapping analyses recovered QTL for larval body color (Yellow) on linkage groups (LGs) 1, 2, 3, and 5 (A) and QTL for spotting pattern (Spotting) on LG 2 (B). These same regions were recovered in polygenic association mapping analyses as SNPs with high posterior inclusion probabilities (PIPs) (B and D; results shown are for the SNP dataset with <50% missing data). Polygenic association mapping also recovered additional high-PIP SNPs (99<sup>th</sup> percentile threshold is indicated as a horizontal line in B and D).

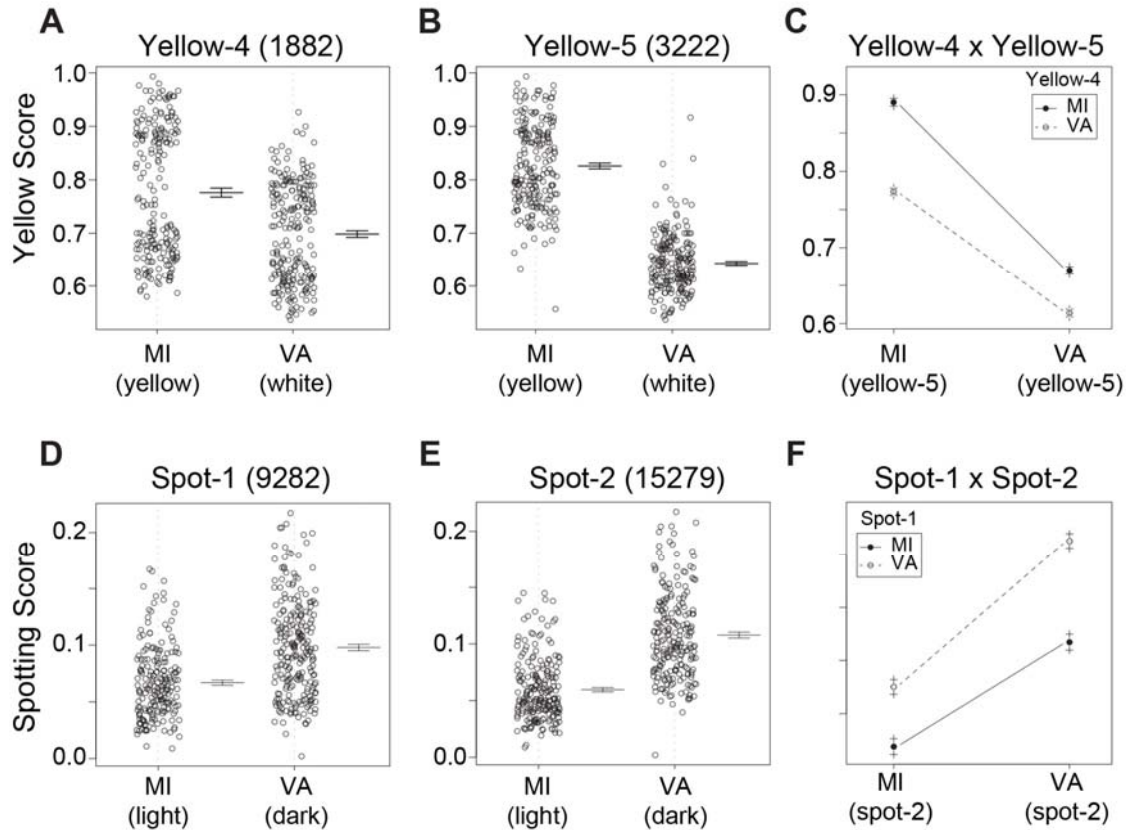

1353  
1354  
1355  
1356  
1357  
1358  
1359  
1360

**Figure 5. Effect and interaction plots for larval body color and spotting pattern.** For each trait, phenotypic effect plots are given for the SNPs closest to the QTL peak for each of the two largest-effect QTL (names are as in Table 1). Yellow-4 (A) and Yellow-5 (B) are from LG 3 and LG 5, respectively. Spot-1 (D) and Spot-2 (E) are from LG 2. For both traits, the two largest-effect QTL also have a significant interaction term (Table 1). In both cases (C and F), the magnitude (but not the direction) of the allelic effects at one locus depends on the genotype of the interacting locus.

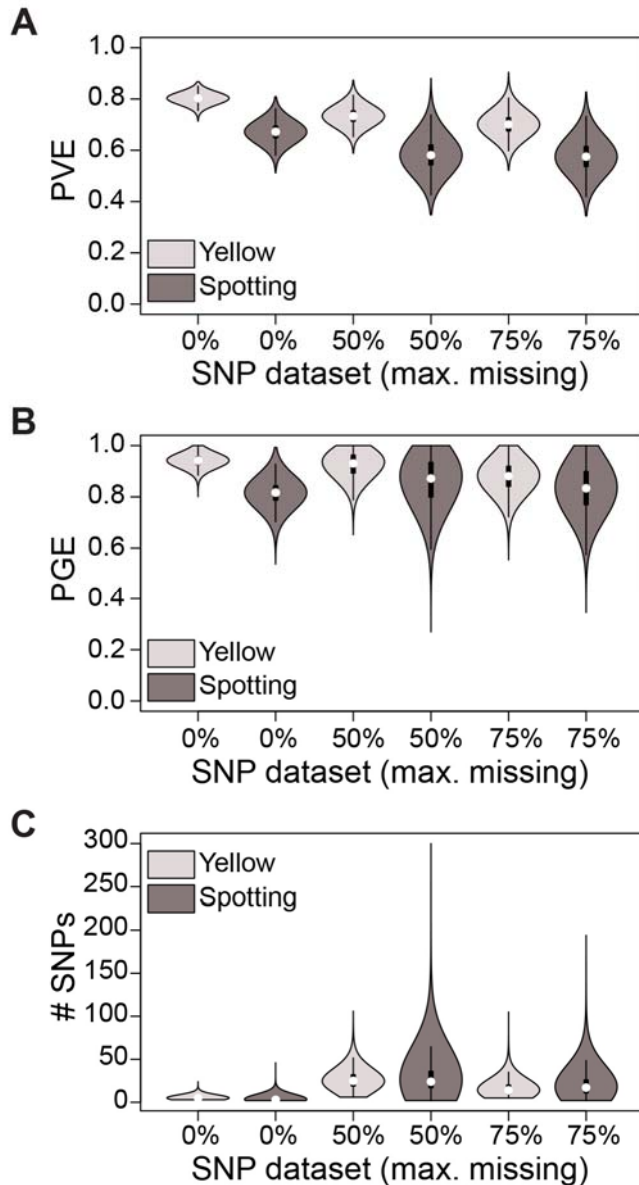

1361  
1362  
1363  
1364  
1365  
1366  
1367  
1368  
1369  
1370  
1371  
1372  
1373  
1374  
1375

**Figure 6. Genetic architecture parameter estimates for larval pigmentation (yellow) and larval color pattern (spotting).** Violin plots display posterior probability distributions for genetic architecture parameters estimated under the BSLMM implemented in GEMMA. Genetic architecture parameters include: (A) PVE= total proportion of phenotypic variance explained by genetic variance; (B) PGE = total proportion of genetic variance explained by sparse (major) effects; and (C) # SNPs (“n\_gamma” in GEMMA output) = number of sparse (major) effect SNPs. SNP dataset refers to the maximum percent missing data in the SNP dataset analyzed (0%: 1205 SNPs; 50% 3070 SNPs; 75%: 4162 SNPs). Distributions are combined across 10 independent runs, each consisting of 20 million post-burnin generations sampled every 1,000 generations. Violin plots depict probability densities (colored area), medians (white dot), interquartile ranges (thick black line), and 95% confidence intervals (thin black lines). For all datasets, PVE and PGE are consistently higher for yellow than for spotting (see also Table 2).

**Table 1. QTL locations and effect sizes for larval pigmentation (Yellow) and larval color pattern (Spotting).**

| Trait    | QTL name | LG*         | Position (interval) <sup>†</sup> | Marker <sup>‡</sup> | LOD   | PVE   | Effect size <sup>§</sup> (SE) | % difference <sup>**</sup> |
|----------|----------|-------------|----------------------------------|---------------------|-------|-------|-------------------------------|----------------------------|
| Yellow   | Yellow-1 | 1           | 105.9 (84.4-112.5)               | 5744                | 8.29  | 1.32  | -0.025 (0.0043)               | 8.06                       |
| Yellow   | Yellow-2 | 2           | 28.2 (16.2-55.1)                 | 19162               | 2.92  | 0.45  | -0.014 (0.0043)               | 4.63                       |
| Yellow   | Yellow-3 | 2           | 179.9 (140.8-194.0)              | 15279               | 3.51  | 0.54  | -0.016 (0.0043)               | 5.13                       |
| Yellow   | Yellow-4 | 3           | 181.9 (179.8-181.9)              | 1882                | 71.23 | 16.27 | -0.084 (0.0043)               | 27.19                      |
| Yellow   | Yellow-5 | 5           | 140.6 (139.9-149.6)              | 3222                | 71.17 | 16.25 | -0.16 (0.0081)                | 51.64                      |
| Yellow   | Yellow-6 | 5           | 149.6 (140.6-154.8)              | 19661               | 4.37  | 0.68  | -0.035 (0.0082)               | 11.43                      |
| Yellow   |          | Interaction | Yellow-3 x Yellow-5              |                     | 12.45 | 2.03  | 0.061 (0.0086)                | 19.58                      |
| Spotting | Spot-1   | 2           | 55.1 (48.0-57.6)                 | 9282                | 28.62 | 12.99 | 0.029 (0.0025)                | 34.86                      |
| Spotting | Spot-2   | 2           | 179.9 (169.1-187.5)              | 15279               | 63.73 | 35.47 | 0.048 (0.0024)                | 57.04                      |
| Spotting |          | Interaction | Spot-1 x Spot-2                  |                     | 1.76  | 0.69  | 0.014 (0.0049)                | 16.49                      |

\* Linkage group number

<sup>†</sup> Position in cM (1.5-LOD support intervals)

<sup>‡</sup> Marker closest to QTL peak

<sup>§</sup> Effect sizes as the difference in the phenotypic averages of among F<sub>2</sub> males carrying a VA allele and F<sub>2</sub> males carrying a MI allele ( $\pm$  standard error).

<sup>\*\*</sup> Effect sizes as a percentage of the difference between average trait values for the two grandparental lines (VA and MI).

**Table 2. Effect size and genetic architecture parameter estimates for larval pigmentation (Yellow) and larval color pattern (Spotting).**

| Parameter <sup>*</sup> | % miss. <sup>†</sup> | Yellow <sup>‡</sup>  | Spotting <sup>‡</sup> |
|------------------------|----------------------|----------------------|-----------------------|
| effect size (maximum)  | 0%                   | 0.69                 | 0.37                  |
| effect size (top 1%)   | 0%                   | 0.023 ( $\pm$ 0.088) | 0.013 ( $\pm$ 0.014)  |
| PVE                    | 0%                   | 0.80 (0.77,0.83)     | 0.67 (0.60,0.73)      |
| PGE                    | 0%                   | 0.94 (0.90,0.98)     | 0.82 (0.72,0.89)      |
| # SNPs                 | 0%                   | 5 (3,10)             | 3 (2,9)               |
| effect size (maximum)  | 50%                  | 0.45                 | 0.33                  |
| effect size (top 1%)   | 50%                  | 0.042 ( $\pm$ 0.15)  | 0.03 ( $\pm$ 0.055)   |
| PVE                    | 50%                  | 0.73 (0.67,0.79)     | 0.58 (0.47,0.70)      |
| PGE                    | 50%                  | 0.93 (0.82,1)        | 0.87 (0.66,0.99)      |
| # SNPs                 | 50%                  | 25 (12,52)           | 24 (8,75)             |
| effect size (maximum)  | 75%                  | 0.57                 | 0.37                  |
| effect size (top 1%)   | 75%                  | 0.015 ( $\pm$ 0.031) | 0.013 ( $\pm$ 0.016)  |
| PVE                    | 75%                  | 0.70 (0.63,0.78)     | 0.58 (0.47,0.69)      |
| PGE                    | 75%                  | 0.88 (0.76,0.98)     | 0.83 (0.65,0.99)      |
| # SNPs                 | 75%                  | 14 (6,35)            | 17 (4,56)             |

\* Genetic architecture parameter estimates for the BSLMM implemented in GEMMA are as follows: PVE= total proportion of phenotypic variance explained by genetic variance; PGE = total proportion of genetic variance explained by sparse (major) effects; # SNPS (“n\_gamma” in GEMMA output) = number of sparse (major) effect SNPs.

† Maximum percent missing data in the SNP dataset (0%: 1205 SNPs; 50% 3070 SNPs; 75%: 4162 SNPs).

‡ For PVE, PGE, and # SNPS, medians (and 95% credible intervals) are reported for the combined posterior distributions of 10 independent GEMMA runs (results for individual runs are given in Table S4). For the top 1% SNPs, medians (and interquartile ranges) are reported.
